# Supplementary material for: Electronic structure and absorption spectra of supramolecular complexes of a fullerene crown ether with a π-extended TTF derivative
Source: Royal Society of Chemistry journal article supplement (doi:10.1039/c0cp02665d), 2011-01-01
Supplement: c0cp02665d.pdf [file c0cp02665d.pdf]

# Electronic structure and absorption spectra of supramolecular complexes of a fullerene crown ether with a $\pi$ -extended TTF derivative

Demeter Tzeli, Ioannis D. Petsalakis and Giannoula Theodorakopoulos

## Supplementary material

- Table 1s: Absolute Energies and Complexation Energies of the **T**, **A**, **B**, benzene<sub>2</sub>, C<sub>60</sub>-benzene, **AT**, and **BT** systems at B3LYP, CAM-B3LYP, M06-HF, and M06-2X/6-31G(d,p) level of theory.
- The coordinates of all the **AT** and **BT** optimized structures are given at B3LYP, CAM-B3LYP, and M06-2X/6-31G(d,p) levels of theory.

**Table 1S.** Complexation Energies CE(eV) in the gas phase and in CHCl<sub>3</sub> solvent, CE<sub>sol</sub>, of the **T**, **A**, **B**, **AT** and **BT** complexes at B3LYP, CAM-B3LYP and M06-2X/6-31G(d,p) level of theory.

| Structure                  | B3LYP       |                              |                 |                   | CAM-B3LYP   |                              |                 |                   | M06-2X      |                              |                 |                   | M06-HF      |                              |                 |
|----------------------------|-------------|------------------------------|-----------------|-------------------|-------------|------------------------------|-----------------|-------------------|-------------|------------------------------|-----------------|-------------------|-------------|------------------------------|-----------------|
|                            | -E          | CE <sub>u</sub> <sup>a</sup> | CE <sup>b</sup> | CE <sub>sol</sub> | -E          | CE <sub>u</sub> <sup>a</sup> | CE <sup>b</sup> | CE <sub>sol</sub> | -E          | CE <sub>u</sub> <sup>a</sup> | CE <sup>b</sup> | CE <sub>sol</sub> | -E          | CE <sub>u</sub> <sup>a</sup> | CE <sup>b</sup> |
| <b>T</b>                   | 3034.725652 |                              |                 |                   | 3033.857384 |                              |                 |                   | 3033.983934 |                              |                 |                   |             |                              |                 |
| <b>A</b>                   | 3686.143418 |                              |                 |                   | 3684.245643 |                              |                 |                   | 3684.864325 |                              |                 |                   |             |                              |                 |
| <b>B</b>                   | 3686.143040 |                              |                 |                   | 3684.245212 |                              |                 |                   | 3684.863844 |                              |                 |                   |             |                              |                 |
| <b>AT1</b>                 | 6720.921803 | 1.43                         | 1.08            | 0.40              | 6718.168868 | 1.79                         | 1.39            | 0.66              | 6718.936345 | 2.40                         | 2.02            | 1.27              |             |                              |                 |
| <b>AT2</b>                 | 6720.914743 | 1.24                         | 0.87            | 0.15              | 6718.162683 | 1.62                         | 1.20            | 0.42              | 6718.937291 | 2.42                         | 2.00            | 1.19              |             |                              |                 |
| <b>AT3</b>                 |             |                              |                 |                   |             |                              |                 |                   | 6718.937229 | 2.42                         | 1.93            | 1.16              |             |                              |                 |
| <b>AT4</b>                 |             |                              |                 |                   | 6718.157795 | 1.49                         | 1.06            | 0.35              | 6718.931805 | 2.27                         | 1.84            | 1.09              |             |                              |                 |
| <b>AT5</b>                 |             |                              |                 |                   |             |                              |                 |                   | 6718.929992 | 2.22                         | 1.79            | 1.06              |             |                              |                 |
| <b>BT1</b>                 |             |                              |                 |                   |             |                              |                 |                   | 6718.940289 | 2.50                         | 1.99            | 1.18              |             |                              |                 |
| <b>BT2</b>                 | 6720.915626 | 1.27                         | 0.92            | 0.20              | 6718.162890 | 1.63                         | 1.25            | 0.48              | 6718.935089 | 2.36                         | 1.97            | 1.19              |             |                              |                 |
| <b>Benzene</b>             | 232.2582123 |                              |                 |                   | 232.113833  |                              |                 |                   | 232.1441867 |                              |                 |                   | 232.187774  |                              |                 |
| <b>C60</b>                 | 2286.174104 |                              |                 |                   | 2284.944970 |                              |                 |                   | 2285.456457 |                              |                 |                   | 2285.889422 |                              |                 |
| <b>Benzene<sub>2</sub></b> | 464.517379  | 0.03                         | 0               |                   | 464.228679  | 0.03                         | -0.01           |                   | 464.293563  | 0.14                         | 0.06            | 0.02              | 464.380786  | 0.14                         | 0.04            |
| <b>C60-Benzene</b>         | 2518.432774 | 0.01                         | -0.03           |                   | 2517.060472 | 0.05                         | -0.02           |                   | 2517.608354 | 0.21                         | 0.12            | 0.05              | 2518.085776 | 0.23                         | 0.12            |

| AT1: B3LYP/6-31G(d,p) |        |        |                         | 84  | 6 | 0 | -6.035383 | 0.145143  | 1.669424  | 174   | 6 | 0 | 1.387902 | 7.333300  | -3.772678 |
|-----------------------|--------|--------|-------------------------|-----|---|---|-----------|-----------|-----------|-------|---|---|----------|-----------|-----------|
| Standard orientation: |        |        |                         | 85  | 6 | 0 | -2.170831 | 2.098759  | 2.163007  | 175   | 1 | 0 | 1.390968 | 10.302735 | -1.072553 |
|                       |        |        |                         | 86  | 6 | 0 | -4.225329 | 3.306626  | 2.460504  | 176   | 1 | 0 | 1.891533 | 8.641553  | -0.712850 |
|                       |        |        |                         | 87  | 6 | 0 | -7.062948 | -1.804999 | 2.816376  | 177   | 8 | 0 | 0.403642 | 8.801314  | -2.150758 |
| Center                | Atomic | Atomic | Coordinates (Angstroms) | 88  | 6 | 0 | -5.594727 | -3.735668 | 2.973926  | 178   | 6 | 0 | 1.242594 | 8.628912  | -3.237031 |
| Number                | Number | Type   | X Y Z                   | 89  | 6 | 0 | -2.811888 | -2.381782 | 1.254647  | 179   | 6 | 0 | 2.198639 | 7.151814  | -4.897894 |
|                       |        |        |                         | 90  | 6 | 0 | -4.243361 | -3.916964 | 2.476539  | 180   | 6 | 0 | 1.894965 | 9.707467  | -3.828189 |
|                       |        |        |                         | 91  | 6 | 0 | -4.616192 | 0.501017  | -0.155790 | 181   | 6 | 0 | 2.855215 | 8.240566  | -5.477717 |
|                       |        |        |                         | 92  | 6 | 0 | -2.924424 | -1.113994 | 0.498914  | 182   | 1 | 0 | 2.334622 | 6.165789  | -5.324513 |
|                       |        |        |                         | 93  | 6 | 0 | -5.966781 | 0.689420  | 0.340276  | 183   | 6 | 0 | 2.706894 | 9.518968  | -4.948026 |
|                       |        |        |                         | 94  | 6 | 0 | -7.168572 | -0.536504 | 2.059471  | 184   | 1 | 0 | 1.746012 | 10.700461 | -3.415481 |
|                       |        |        |                         | 95  | 6 | 0 | -1.621813 | 3.187535  | 1.500743  | 185   | 1 | 0 | 3.481464 | 8.077862  | -6.348889 |
|                       |        |        |                         | 96  | 1 | 0 | -1.577825 | 1.203684  | 2.315348  | 186   | 1 | 0 | 3.207751 | 10.366601 | -5.403402 |
|                       |        |        |                         | 97  | 6 | 0 | -3.675716 | 4.417744  | 1.815213  | ----- |   |   |          |           |           |
|                       |        |        |                         | 98  | 1 | 0 | -5.246665 | 3.362049  | 2.825625  |       |   |   |          |           |           |
|                       |        |        |                         | 99  | 6 | 0 | -8.123907 | -2.675290 | 2.357887  |       |   |   |          |           |           |
|                       |        |        |                         | 100 | 6 | 0 | -6.615326 | -4.597521 | 2.558487  |       |   |   |          |           |           |
|                       |        |        |                         | 101 | 6 | 0 | -2.529888 | -3.433298 | 0.301640  |       |   |   |          |           |           |
|                       |        |        |                         | 102 | 6 | 0 | -3.961592 | -4.956305 | 1.582592  |       |   |   |          |           |           |
|                       |        |        |                         | 103 | 6 | 0 | -4.399120 | 0.241916  | -1.513925 |       |   |   |          |           |           |
|                       |        |        |                         | 104 | 6 | 0 | -2.702231 | -1.418301 | -0.899383 |       |   |   |          |           |           |
|                       |        |        |                         | 105 | 6 | 0 | -7.051770 | 0.602184  | -0.539072 |       |   |   |          |           |           |
|                       |        |        |                         | 106 | 6 | 0 | -8.293307 | -0.659644 | 1.156857  |       |   |   |          |           |           |
|                       |        |        |                         | 107 | 8 | 0 | -0.317354 | 3.141899  | 1.014321  |       |   |   |          |           |           |
|                       |        |        |                         | 108 | 6 | 0 | -2.373267 | 4.363383  | 1.314344  |       |   |   |          |           |           |
|                       |        |        |                         | 109 | 1 | 0 | -4.276106 | 5.311169  | 1.696274  |       |   |   |          |           |           |
|                       |        |        |                         | 110 | 6 | 0 | -8.883030 | -1.973628 | 1.338536  |       |   |   |          |           |           |
|                       |        |        |                         | 111 | 6 | 0 | -7.913254 | -4.053408 | 2.241851  |       |   |   |          |           |           |
|                       |        |        |                         | 112 | 6 | 0 | -6.324938 | -5.665564 | 1.615034  |       |   |   |          |           |           |
|                       |        |        |                         | 113 | 6 | 0 | -3.083053 | -4.708082 | 0.465667  |       |   |   |          |           |           |
|                       |        |        |                         | 114 | 6 | 0 | -2.459352 | -2.844217 | -1.023396 |       |   |   |          |           |           |
|                       |        |        |                         | 115 | 6 | 0 | -5.026985 | -5.840586 | 1.137631  |       |   |   |          |           |           |
|                       |        |        |                         | 116 | 6 | 0 | -3.416499 | -0.743432 | -1.896653 |       |   |   |          |           |           |
|                       |        |        |                         | 117 | 6 | 0 | -5.528571 | 0.137770  | -2.424815 |       |   |   |          |           |           |
|                       |        |        |                         | 118 | 6 | 0 | -8.246190 | -0.089122 | -0.119924 |       |   |   |          |           |           |
|                       |        |        |                         | 119 | 6 | 0 | -6.826551 | 0.312321  | -1.946436 |       |   |   |          |           |           |
|                       |        |        |                         | 120 | 6 | 0 | -0.095864 | 2.177702  | -0.039627 |       |   |   |          |           |           |
|                       |        |        |                         | 121 | 8 | 0 | -1.750591 | 5.378248  | 0.635991  |       |   |   |          |           |           |
|                       |        |        |                         | 122 | 6 | 0 | -9.398754 | -2.668433 | 0.244845  |       |   |   |          |           |           |
|                       |        |        |                         | 123 | 6 | 0 | -8.437624 | -4.776216 | 1.097557  |       |   |   |          |           |           |
|                       |        |        |                         | 124 | 6 | 0 | -7.454768 | -5.774744 | 0.708956  |       |   |   |          |           |           |
|                       |        |        |                         | 125 | 6 | 0 | -3.598199 | -5.431417 | -0.682450 |       |   |   |          |           |           |
|                       |        |        |                         | 126 | 6 | 0 | -2.942378 | -3.542977 | -2.130144 |       |   |   |          |           |           |
|                       |        |        |                         | 127 | 6 | 0 | -4.801501 | -6.133998 | -0.266754 |       |   |   |          |           |           |
|                       |        |        |                         | 128 | 6 | 0 | -3.929932 | -1.470738 | -3.043372 |       |   |   |          |           |           |
|                       |        |        |                         | 129 | 6 | 0 | -5.237712 | -0.925403 | -3.371023 |       |   |   |          |           |           |
|                       |        |        |                         | 130 | 6 | 0 | -8.770967 | -0.815484 | -1.262041 |       |   |   |          |           |           |
|                       |        |        |                         | 131 | 6 | 0 | -7.892407 | -0.566641 | -2.393836 |       |   |   |          |           |           |
|                       |        |        |                         | 132 | 6 | 0 | -0.651625 | 2.624589  | -1.377347 |       |   |   |          |           |           |
|                       |        |        |                         | 133 | 1 | 0 | 0.986461  | 2.046354  | -0.091798 |       |   |   |          |           |           |
|                       |        |        |                         | 134 | 1 | 0 | -0.551732 | 1.221503  | 0.234595  |       |   |   |          |           |           |
|                       |        |        |                         | 135 | 6 | 0 | -2.490420 | 6.574242  | 0.389663  |       |   |   |          |           |           |
|                       |        |        |                         | 136 | 6 | 0 | -9.333701 | -2.080681 | -1.083867 |       |   |   |          |           |           |
|                       |        |        |                         | 137 | 6 | 0 | -9.165152 | -4.098066 | 0.117844  |       |   |   |          |           |           |
|                       |        |        |                         | 138 | 6 | 0 | -7.240055 | -6.053790 | -0.641980 |       |   |   |          |           |           |
|                       |        |        |                         | 139 | 6 | 0 | -3.529064 | -4.861992 | -1.955643 |       |   |   |          |           |           |
|                       |        |        |                         | 140 | 6 | 0 | -3.699915 | -2.843547 | -3.156401 |       |   |   |          |           |           |
|                       |        |        |                         | 141 | 6 | 0 | -5.886014 | -6.236406 | -1.139703 |       |   |   |          |           |           |
|                       |        |        |                         | 142 | 6 | 0 | -6.260243 | -1.775532 | -3.797298 |       |   |   |          |           |           |
|                       |        |        |                         | 143 | 6 | 0 | -7.613890 | -1.592257 | -3.299596 |       |   |   |          |           |           |
|                       |        |        |                         | 144 | 1 | 0 | -1.705363 | 2.919235  | -1.265694 |       |   |   |          |           |           |
|                       |        |        |                         | 145 | 1 | 0 | -0.622243 | 1.768162  | -2.069904 |       |   |   |          |           |           |
|                       |        |        |                         | 146 | 8 | 0 | 0.122133  | 3.702030  | -1.893846 |       |   |   |          |           |           |
|                       |        |        |                         | 147 | 6 | 0 | -1.607344 | 7.520278  | -0.391829 |       |   |   |          |           |           |
|                       |        |        |                         | 148 | 1 | 0 | -2.794234 | 7.034743  | 1.337956  |       |   |   |          |           |           |
|                       |        |        |                         | 149 | 1 | 0 | -3.390270 | 6.350100  | -0.198972 |       |   |   |          |           |           |
|                       |        |        |                         | 150 | 6 | 0 | -9.048509 | -3.143534 | -2.027725 |       |   |   |          |           |           |
|                       |        |        |                         | 151 | 6 | 0 | -8.944649 | -4.390992 | -1.284776 |       |   |   |          |           |           |
|                       |        |        |                         | 152 | 6 | 0 | -8.000263 | -5.349215 | -1.658793 |       |   |   |          |           |           |
|                       |        |        |                         | 153 | 6 | 0 | -4.654650 | -4.971795 | -2.863010 |       |   |   |          |           |           |
|                       |        |        |                         | 154 | 6 | 0 | -4.759519 | -3.724426 | -3.606341 |       |   |   |          |           |           |
|                       |        |        |                         | 155 | 6 | 0 | -5.811102 | -5.644541 | -2.463704 |       |   |   |          |           |           |
|                       |        |        |                         | 156 | 6 | 0 | -6.016301 | -3.201869 | -3.919134 |       |   |   |          |           |           |
|                       |        |        |                         | 157 | 6 | 0 | -8.204887 | -2.905592 | -3.114275 |       |   |   |          |           |           |
|                       |        |        |                         | 158 | 6 | 0 | -0.387396 | 4.172802  | -3.134861 |       |   |   |          |           |           |
|                       |        |        |                         | 159 | 8 | 0 | -0.514035 | 7.938847  | 0.445109  |       |   |   |          |           |           |
|                       |        |        |                         | 160 | 1 | 0 | -1.223700 | 7.051804  | -1.302425 |       |   |   |          |           |           |
|                       |        |        |                         | 161 | 1 | 0 | -2.204333 | 8.393345  | -0.681996 |       |   |   |          |           |           |
|                       |        |        |                         | 162 | 6 | 0 | -7.117961 | -5.096638 | -2.785703 |       |   |   |          |           |           |
|                       |        |        |                         | 163 | 6 | 0 | -7.218679 | -3.901181 | -4.377424 |       |   |   |          |           |           |
|                       |        |        |                         | 164 | 1 | 0 | -0.585601 | 3.323533  | -3.807310 |       |   |   |          |           |           |
|                       |        |        |                         | 165 | 1 | 0 | -1.336106 | 4.709140  | -2.984958 |       |   |   |          |           |           |
|                       |        |        |                         | 166 | 6 | 0 | 0.614892  | 5.071533  | -3.825722 |       |   |   |          |           |           |
|                       |        |        |                         | 167 | 6 | 0 | 0.003190  | 9.243325  | 0.161326  |       |   |   |          |           |           |
|                       |        |        |                         | 168 | 1 | 0 | 0.274950  | 5.242303  | -4.855403 |       |   |   |          |           |           |
|                       |        |        |                         | 169 | 1 | 0 | 1.593124  | 4.574551  | -3.862171 |       |   |   |          |           |           |
|                       |        |        |                         | 170 | 8 | 0 | 0.709116  | 6.318968  | -3.136211 |       |   |   |          |           |           |
|                       |        |        |                         | 171 | 1 | 0 | -0.827838 | 9.919969  | -0.074868 |       |   |   |          |           |           |
|                       |        |        |                         | 172 | 1 | 0 | 0.477951  | 9.598411  | 1.082144  |       |   |   |          |           |           |
|                       |        |        |                         | 173 | 6 | 0 | 1.026388  | 9.271334  | -0.959837 |       |   |   |          |           |           |

| AT2: B3LYP/6-31G(d,p) |        |        |                         |   |   |    | 84  | 6 | 0         | -7.686186  | 1.478816  | 1.491574  | 174   | 6 | 0        | 5.083243 | 2.660282  | -2.330621 |
|-----------------------|--------|--------|-------------------------|---|---|----|-----|---|-----------|------------|-----------|-----------|-------|---|----------|----------|-----------|-----------|
| Standard orientation: |        |        |                         |   |   |    | 85  | 6 | 0         | -2.714243  | 1.619733  | 1.108261  | 175   | 1 | 0        | 4.221853 | 6.051109  | -3.163997 |
|                       |        |        |                         |   |   |    | 86  | 6 | 0         | -4.217324  | 2.958857  | -0.185864 | 176   | 1 | 0        | 2.904731 | 6.364131  | -2.009254 |
|                       |        |        |                         |   |   |    | 87  | 6 | 0         | -8.389226  | -0.165942 | 3.208598  | 177   | 8 | 0        | 3.990245 | 4.684776  | -1.613034 |
| Center                | Atomic | Atomic | Coordinates (Angstroms) |   |   | 88 | 6   | 0 | -7.483696 | -2.390043  | 2.855668  | 178       | 6     | 0 | 5.154698 | 4.026355 | -2.002209 |           |
| Number                | Number | Type   | X                       | Y | Z | 89 | 6   | 0 | -5.724858 | -1.735950  | -0.147663 | 179       | 6     | 0 | 6.261044 | 1.975841 | -2.644390 |           |
|                       |        |        |                         |   |   |    | 90  | 6 | 0         | -6.640300  | -2.891755 | 1.787132  | 180   | 6 | 0        | 6.376235 | 4.691497  | -1.998795 |
|                       |        |        |                         |   |   |    | 91  | 6 | 0         | -7.332761  | 1.504722  | -0.820570 | 181   | 6 | 0        | 7.483515 | 2.652638  | -2.645800 |
|                       |        |        |                         |   |   |    | 92  | 6 | 0         | -5.926807  | -0.473021 | -0.891559 | 182   | 1 | 0        | 6.240167 | 0.919573  | -2.881460 |
|                       |        |        |                         |   |   |    | 93  | 6 | 0         | -8.178906  | 2.005081  | 0.246496  | 183   | 6 | 0        | 7.547823 | 4.007456  | -2.329269 |
|                       |        |        |                         |   |   |    | 94  | 6 | 0         | -8.588117  | 1.093875  | 2.459389  | 184   | 1 | 0        | 6.399374 | 5.741674  | -1.723826 |
|                       |        |        |                         |   |   |    | 95  | 6 | 0         | -1.684136  | 1.905561  | 0.216911  | 185   | 1 | 0        | 8.388082 | 2.105517  | -2.890397 |
|                       |        |        |                         |   |   |    | 96  | 1 | 0         | -2.492003  | 1.033712  | 1.992788  | 186   | 1 | 0        | 8.499376 | 4.528019  | -2.325634 |
|                       |        |        |                         |   |   |    | 97  | 6 | 0         | -3.190237  | 3.270630  | -1.077193 | ----- |   |          |          |           |           |
|                       |        |        |                         |   |   |    | 98  | 1 | 0         | -5.197175  | 3.393690  | -0.354944 |       |   |          |          |           |           |
|                       |        |        |                         |   |   |    | 99  | 6 | 0         | -9.693458  | -0.751059 | 3.432301  |       |   |          |          |           |           |
|                       |        |        |                         |   |   |    | 100 | 6 | 0         | -8.731136  | -2.978675 | 3.091767  |       |   |          |          |           |           |
|                       |        |        |                         |   |   |    | 101 | 6 | 0         | -6.186819  | -2.819815 | -0.988233 |       |   |          |          |           |           |
|                       |        |        |                         |   |   |    | 102 | 6 | 0         | -7.069632  | -3.962270 | 0.995034  |       |   |          |          |           |           |
|                       |        |        |                         |   |   |    | 103 | 6 | 0         | -7.886974  | 1.207763  | -2.070252 |       |   |          |          |           |           |
|                       |        |        |                         |   |   |    | 104 | 6 | 0         | -6.506479  | -0.814015 | -2.174160 |       |   |          |          |           |           |
|                       |        |        |                         |   |   |    | 105 | 6 | 0         | -9.548702  | 2.187371  | 0.024789  |       |   |          |          |           |           |
|                       |        |        |                         |   |   |    | 106 | 6 | 0         | -10.010065 | 1.252563  | 2.241627  |       |   |          |          |           |           |
|                       |        |        |                         |   |   |    | 107 | 8 | 0         | -0.404666  | 1.420174  | 0.467528  |       |   |          |          |           |           |
|                       |        |        |                         |   |   |    | 108 | 6 | 0         | -1.911712  | 2.732174  | -0.898302 |       |   |          |          |           |           |
|                       |        |        |                         |   |   |    | 109 | 1 | 0         | -3.400358  | 3.930687  | -1.909781 |       |   |          |          |           |           |
|                       |        |        |                         |   |   |    | 110 | 6 | 0         | -10.692336 | 0.119527  | 2.839227  |       |   |          |          |           |           |
|                       |        |        |                         |   |   |    | 111 | 6 | 0         | -9.865718  | -2.138379 | 3.388590  |       |   |          |          |           |           |
|                       |        |        |                         |   |   |    | 112 | 6 | 0         | -9.185814  | -4.079207 | 2.255881  |       |   |          |          |           |           |
|                       |        |        |                         |   |   |    | 113 | 6 | 0         | -6.838607  | -3.924453 | -0.428671 |       |   |          |          |           |           |
|                       |        |        |                         |   |   |    | 114 | 6 | 0         | -6.666909  | -2.255663 | -2.236649 |       |   |          |          |           |           |
|                       |        |        |                         |   |   |    | 115 | 6 | 0         | -8.373167  | -4.561558 | 1.231180  |       |   |          |          |           |           |
|                       |        |        |                         |   |   |    | 116 | 6 | 0         | -7.462382  | 0.017661  | -2.766811 |       |   |          |          |           |           |
|                       |        |        |                         |   |   |    | 117 | 6 | 0         | -9.312853  | 1.383203  | -2.294772 |       |   |          |          |           |           |
|                       |        |        |                         |   |   |    | 118 | 6 | 0         | -10.489216 | 1.803641  | 1.048820  |       |   |          |          |           |           |
|                       |        |        |                         |   |   |    | 119 | 6 | 0         | -10.126068 | 1.862781  | -1.269430 |       |   |          |          |           |           |
|                       |        |        |                         |   |   |    | 120 | 6 | 0         | -0.184640  | 0.046682  | 0.113003  |       |   |          |          |           |           |
|                       |        |        |                         |   |   |    | 121 | 8 | 0         | -0.843534  | 2.957007  | -1.730737 |       |   |          |          |           |           |
|                       |        |        |                         |   |   |    | 122 | 6 | 0         | -11.819882 | -0.424037 | 2.224108  |       |   |          |          |           |           |
|                       |        |        |                         |   |   |    | 123 | 6 | 0         | -11.031466 | -2.706653 | 2.736906  |       |   |          |          |           |           |
|                       |        |        |                         |   |   |    | 124 | 6 | 0         | -10.611391 | -3.909463 | 2.035881  |       |   |          |          |           |           |
|                       |        |        |                         |   |   |    | 125 | 6 | 0         | -7.998630  | -4.496480 | -1.087796 |       |   |          |          |           |           |
|                       |        |        |                         |   |   |    | 126 | 6 | 0         | -7.774011  | -2.811524 | -2.878151 |       |   |          |          |           |           |
|                       |        |        |                         |   |   |    | 127 | 6 | 0         | -8.948982  | -4.891287 | -0.060582 |       |   |          |          |           |           |
|                       |        |        |                         |   |   |    | 128 | 6 | 0         | -8.621172  | -0.557475 | -3.425206 |       |   |          |          |           |           |
|                       |        |        |                         |   |   |    | 129 | 6 | 0         | -9.767652  | 0.288299  | -3.134067 |       |   |          |          |           |           |
|                       |        |        |                         |   |   |    | 130 | 6 | 0         | -11.655069 | 1.232078  | 0.399857  |       |   |          |          |           |           |
|                       |        |        |                         |   |   |    | 131 | 6 | 0         | -11.431473 | 1.269464  | -1.036453 |       |   |          |          |           |           |
|                       |        |        |                         |   |   |    | 132 | 6 | 0         | 0.358121   | -0.101287 | -1.293829 |       |   |          |          |           |           |
|                       |        |        |                         |   |   |    | 133 | 1 | 0         | 0.539189   | -0.348217 | 0.832967  |       |   |          |          |           |           |
|                       |        |        |                         |   |   |    | 134 | 1 | 0         | -1.114991  | -0.523558 | 0.210197  |       |   |          |          |           |           |
|                       |        |        |                         |   |   |    | 135 | 6 | 0         | -1.030202  | 3.859638  | -2.820217 |       |   |          |          |           |           |
|                       |        |        |                         |   |   |    | 136 | 6 | 0         | -12.306485 | 0.139189  | 0.974598  |       |   |          |          |           |           |
|                       |        |        |                         |   |   |    | 137 | 6 | 0         | -11.989826 | -1.867191 | 2.165564  |       |   |          |          |           |           |
|                       |        |        |                         |   |   |    | 138 | 6 | 0         | -11.166630 | -4.223581 | 0.794173  |       |   |          |          |           |           |
|                       |        |        |                         |   |   |    | 139 | 6 | 0         | -8.457908  | -3.951340 | -2.288599 |       |   |          |          |           |           |
|                       |        |        |                         |   |   |    | 140 | 6 | 0         | -8.775323  | -1.944418 | -3.478791 |       |   |          |          |           |           |
|                       |        |        |                         |   |   |    | 141 | 6 | 0         | -10.318167 | -4.724039 | -0.275772 |       |   |          |          |           |           |
|                       |        |        |                         |   |   |    | 142 | 6 | 0         | -11.019445 | -0.287346 | -2.907743 |       |   |          |          |           |           |
|                       |        |        |                         |   |   |    | 143 | 6 | 0         | -11.868028 | 0.213275  | -1.838198 |       |   |          |          |           |           |
|                       |        |        |                         |   |   |    | 144 | 1 | 0         | -0.312736  | 0.381658  | -2.016158 |       |   |          |          |           |           |
|                       |        |        |                         |   |   |    | 145 | 1 | 0         | 0.420456   | -1.172561 | 1.541760  |       |   |          |          |           |           |
|                       |        |        |                         |   |   |    | 146 | 8 | 0         | 1.658461   | 0.485793  | -1.352916 |       |   |          |          |           |           |
|                       |        |        |                         |   |   |    | 147 | 6 | 0         | 0.265039   | 3.965888  | -3.595258 |       |   |          |          |           |           |
|                       |        |        |                         |   |   |    | 148 | 1 | 0         | -1.323810  | 4.849637  | -2.448359 |       |   |          |          |           |           |
|                       |        |        |                         |   |   |    | 149 | 1 | 0         | -1.817001  | 3.492286  | -3.492615 |       |   |          |          |           |           |
|                       |        |        |                         |   |   |    | 150 | 6 | 0         | -12.764226 | -0.955050 | 0.140953  |       |   |          |          |           |           |
|                       |        |        |                         |   |   |    | 151 | 6 | 0         | -12.568326 | -2.195541 | 0.876915  |       |   |          |          |           |           |
|                       |        |        |                         |   |   |    | 152 | 6 | 0         | -12.165061 | -3.350127 | 0.203141  |       |   |          |          |           |           |
|                       |        |        |                         |   |   |    | 153 | 6 | 0         | -9.880307  | -3.781701 | -2.513356 |       |   |          |          |           |           |
|                       |        |        |                         |   |   |    | 154 | 6 | 0         | -10.076484 | -2.540876 | -3.249106 |       |   |          |          |           |           |
|                       |        |        |                         |   |   |    | 155 | 6 | 0         | -10.792881 | -4.158974 | -1.526266 |       |   |          |          |           |           |
|                       |        |        |                         |   |   |    | 156 | 6 | 0         | -11.177411 | -1.729502 | -2.967565 |       |   |          |          |           |           |
|                       |        |        |                         |   |   |    | 157 | 6 | 0         | -12.549249 | -0.920318 | -1.238310 |       |   |          |          |           |           |
|                       |        |        |                         |   |   |    | 158 | 6 | 0         | 2.248282   | 0.341188  | -2.639488 |       |   |          |          |           |           |
|                       |        |        |                         |   |   |    | 159 | 8 | 0         | 1.254352   | 4.589628  | -2.794488 |       |   |          |          |           |           |
|                       |        |        |                         |   |   |    | 160 | 1 | 0         | 0.596692   | 2.966816  | -3.916538 |       |   |          |          |           |           |
|                       |        |        |                         |   |   |    | 161 | 1 | 0         | 0.069631   | 4.560465  | -4.501744 |       |   |          |          |           |           |
|                       |        |        |                         |   |   |    | 162 | 6 | 0         | -11.935209 | -3.310517 | -1.231055 |       |   |          |          |           |           |
|                       |        |        |                         |   |   |    | 163 | 6 | 0         | -12.123564 | -2.121360 | -1.936507 |       |   |          |          |           |           |
|                       |        |        |                         |   |   |    | 164 | 1 | 0         | 2.176466   | -0.705897 | -2.970812 |       |   |          |          |           |           |
|                       |        |        |                         |   |   |    | 165 | 1 | 0         | 1.718434   | 0.962063  | -3.376759 |       |   |          |          |           |           |
|                       |        |        |                         |   |   |    | 166 | 6 | 0         | 3.714096   | 0.711394  | -2.601592 |       |   |          |          |           |           |
|                       |        |        |                         |   |   |    | 167 | 6 | 0         | 2.432091   | 4.914692  | -3.519885 |       |   |          |          |           |           |
|                       |        |        |                         |   |   |    | 168 | 1 | 0         | 4.149481   | 0.490450  | -3.585164 |       |   |          |          |           |           |
|                       |        |        |                         |   |   |    | 169 | 1 | 0         | 4.239465   | 0.122779  | -1.840880 |       |   |          |          |           |           |
|                       |        |        |                         |   |   |    | 170 | 8 | 0         | 3.829798   | 2.103815  | -2.309212 |       |   |          |          |           |           |
|                       |        |        |                         |   |   |    | 171 | 1 | 0         | 2.879246   | 4.014449  | -3.963886 |       |   |          |          |           |           |
|                       |        |        |                         |   |   |    | 172 | 1 | 0         | 2.194203   | 5.615490  | -4.336896 |       |   |          |          |           |           |
|                       |        |        |                         |   |   |    | 173 | 6 | 0         | 3.417442   | 5.587769  | -2.583979 |       |   |          |          |           |           |

BT2: B3LYP/6-31G(d,p)

Standard orientation:

Center Atomic Atomic Coordinates (Angstroms)  
Number Number Type X Y Z

|    |    |   |            |           |           |     |   |   |           |           |           |     |   |   |           |           |           |
|----|----|---|------------|-----------|-----------|-----|---|---|-----------|-----------|-----------|-----|---|---|-----------|-----------|-----------|
| 1  | 6  | 0 | -7.711408  | -2.318735 | 1.981849  | 84  | 6 | 0 | 7.499007  | -0.562048 | 2.942695  | 174 | 6 | 0 | -2.664353 | 10.191085 | 2.862933  |
| 2  | 6  | 0 | -8.604018  | -3.371699 | 1.831699  | 85  | 6 | 0 | 8.024395  | 0.501127  | 0.923058  | 175 | 1 | 0 | -0.851645 | 9.273345  | 3.612406  |
| 3  | 6  | 0 | -9.558053  | -3.384907 | 0.801682  | 86  | 6 | 0 | 5.900459  | 0.452350  | -2.138809 | 176 | 6 | 0 | -3.576074 | 10.220347 | 1.810967  |
| 4  | 6  | 0 | -9.589787  | -2.297384 | -0.116567 | 87  | 6 | 0 | 7.584101  | 0.683118  | -0.392455 | 177 | 1 | 0 | -4.123886 | 9.439004  | -0.112202 |
| 5  | 6  | 0 | -8.669065  | -1.258324 | 0.024068  | 88  | 6 | 0 | 4.724494  | -1.807256 | -2.815266 | 178 | 1 | 0 | -2.808962 | 10.819726 | 3.734905  |
| 6  | 6  | 0 | -7.729919  | -1.244110 | 1.073936  | 89  | 6 | 0 | 3.769735  | 0.491217  | -3.523932 | 179 | 1 | 0 | -4.438853 | 10.877059 | 1.853970  |
| 7  | 6  | 0 | -10.506057 | -4.494689 | 0.584155  | 90  | 6 | 0 | 5.618799  | -4.775947 | 2.902886  | 180 | 1 | 0 | -1.271353 | 4.727075  | -0.243753 |
| 8  | 6  | 0 | -10.586103 | -2.351992 | -1.210048 | 91  | 6 | 0 | 5.189732  | -5.857867 | 0.860227  | 181 | 7 | 0 | -0.949307 | 4.863975  | 0.727248  |
| 9  | 6  | 0 | -10.776195 | -3.713794 | -1.759208 | 92  | 6 | 0 | 4.762713  | -5.661273 | -0.454208 | 182 | 6 | 0 | -2.145770 | 4.998709  | 1.654672  |
| 10 | 6  | 0 | -10.734464 | -4.801538 | -0.847949 | 93  | 6 | 0 | 4.043872  | -4.035665 | -1.987899 | 183 | 1 | 0 | -0.571121 | 2.822382  | 1.036214  |
| 11 | 6  | 0 | -10.854822 | -6.107257 | -1.343319 | 94  | 6 | 0 | 8.051469  | -3.336437 | 3.272010  | 184 | 1 | 0 | 0.702399  | 3.719614  | 0.200472  |
| 12 | 1  | 0 | -10.763227 | -6.948960 | -0.665257 | 95  | 6 | 0 | 8.753622  | -1.116148 | 2.459312  | 185 | 1 | 0 | -1.736025 | 5.093004  | 2.660987  |
| 13 | 6  | 0 | -11.046151 | -6.347543 | -2.703512 | 96  | 6 | 0 | 9.080510  | -0.456168 | 1.207439  | 186 | 1 | 0 | -2.603606 | 5.949169  | 1.380586  |
| 14 | 6  | 0 | -11.090980 | -5.279192 | -3.597103 | 97  | 6 | 0 | 7.171123  | -0.352826 | -2.453353 |     |   |   |           |           |           |
| 15 | 6  | 0 | -10.941706 | -3.975342 | -3.126018 | 98  | 6 | 0 | 5.703471  | 1.731668  | -3.031848 |     |   |   |           |           |           |
| 16 | 1  | 0 | -6.978578  | -2.332721 | 2.781438  | 99  | 6 | 0 | 8.191676  | -0.063751 | -1.477993 |     |   |   |           |           |           |
| 17 | 1  | 0 | -8.531559  | -4.217983 | 2.505697  | 100 | 6 | 0 | 5.915957  | -2.330006 | -3.267012 |     |   |   |           |           |           |
| 18 | 1  | 0 | -8.645965  | -0.453340 | -0.701390 | 101 | 7 | 0 | 4.744655  | 1.425939  | -4.080475 |     |   |   |           |           |           |
| 19 | 1  | 0 | -11.135578 | -7.368207 | -3.062521 | 102 | 6 | 0 | 2.479940  | 1.163710  | -3.059423 |     |   |   |           |           |           |
| 20 | 1  | 0 | -11.216993 | -5.457289 | -4.660623 | 103 | 1 | 0 | 3.485641  | -0.222122 | -4.302404 |     |   |   |           |           |           |
| 21 | 1  | 0 | -10.918504 | -3.154675 | -3.853221 | 104 | 6 | 0 | 6.871523  | -5.326149 | 2.413528  |     |   |   |           |           |           |
| 22 | 16 | 0 | -11.189553 | 0.355472  | -0.870464 | 105 | 6 | 0 | 6.605910  | -5.994149 | 1.150946  |     |   |   |           |           |           |
| 23 | 6  | 0 | -13.284546 | 0.242267  | -2.500385 | 106 | 6 | 0 | 5.736928  | -5.588881 | -1.531449 |     |   |   |           |           |           |
| 24 | 6  | 0 | -12.640645 | 1.011751  | -1.618086 | 107 | 6 | 0 | 5.284939  | -4.584825 | -2.476832 |     |   |   |           |           |           |
| 25 | 1  | 0 | -14.177903 | 0.528045  | -3.042245 | 108 | 6 | 0 | 8.062630  | -4.622029 | 2.594803  |     |   |   |           |           |           |
| 26 | 1  | 0 | -12.931747 | 2.015714  | -1.334476 | 109 | 6 | 0 | 9.022491  | -2.476426 | 2.619504  |     |   |   |           |           |           |
| 27 | 6  | 0 | -11.175866 | -5.120298 | 1.599842  | 110 | 6 | 0 | 9.663139  | -1.178429 | 0.166996  |     |   |   |           |           |           |
| 28 | 16 | 0 | -12.424092 | -6.373150 | 1.338486  | 111 | 6 | 0 | 7.177662  | -1.582164 | -3.076966 |     |   |   |           |           |           |
| 29 | 6  | 0 | -12.365915 | -5.649668 | 3.893642  | 112 | 1 | 0 | 5.308869  | 2.523169  | -2.383659 |     |   |   |           |           |           |
| 30 | 6  | 0 | -13.005118 | -6.405819 | 2.996282  | 113 | 1 | 0 | 6.646089  | 2.089962  | -3.451531 |     |   |   |           |           |           |
| 31 | 1  | 0 | -12.607678 | -5.589481 | 4.947660  | 114 | 6 | 0 | 9.218559  | -0.973975 | -1.203255 |     |   |   |           |           |           |
| 32 | 1  | 0 | -13.846082 | -7.053675 | 3.211462  | 115 | 6 | 0 | 6.209519  | -3.736638 | -3.095048 |     |   |   |           |           |           |
| 33 | 16 | 0 | -12.623689 | -1.352855 | -2.831711 | 116 | 6 | 0 | 5.336762  | 1.004132  | -5.354259 |     |   |   |           |           |           |
| 34 | 16 | 0 | -11.004497 | -4.692681 | 3.327819  | 117 | 6 | 0 | 1.325907  | 0.393160  | -2.883739 |     |   |   |           |           |           |
| 35 | 6  | 0 | -11.323101 | -1.273161 | -1.604154 | 118 | 6 | 0 | 2.418219  | 2.541707  | -2.821765 |     |   |   |           |           |           |
| 36 | 6  | 0 | -6.795813  | -0.178532 | 1.188423  | 119 | 6 | 0 | 7.540697  | -5.926199 | 0.116000  |     |   |   |           |           |           |
| 37 | 6  | 0 | -5.991421  | 0.730847  | 1.281156  | 120 | 6 | 0 | 7.098114  | -5.717059 | -1.248923 |     |   |   |           |           |           |
| 38 | 6  | 0 | -5.044451  | 1.783919  | 1.379229  | 121 | 6 | 0 | 9.039285  | -4.554927 | 1.520979  |     |   |   |           |           |           |
| 39 | 6  | 0 | -4.947150  | 2.764996  | 0.367841  | 122 | 6 | 0 | 9.633192  | -3.229710 | 1.535779  |     |   |   |           |           |           |
| 40 | 6  | 0 | -4.181147  | 1.882847  | 2.489315  | 123 | 6 | 0 | 9.948791  | -2.592803 | 0.334142  |     |   |   |           |           |           |
| 41 | 6  | 0 | -4.011362  | 3.787338  | 0.458386  | 124 | 6 | 0 | 8.216426  | -2.548403 | -2.790547 |     |   |   |           |           |           |
| 42 | 1  | 0 | -5.624089  | 2.715235  | -0.478663 | 125 | 6 | 0 | 9.232999  | -2.249299 | -1.877898 |     |   |   |           |           |           |
| 43 | 6  | 0 | -3.248112  | 2.911060  | 2.570556  | 126 | 6 | 0 | 7.624239  | -3.873868 | -2.801759 |     |   |   |           |           |           |
| 44 | 1  | 0 | -4.257076  | 1.150171  | 3.285300  | 127 | 1 | 0 | 4.542755  | 0.878053  | -6.095314 |     |   |   |           |           |           |
| 45 | 6  | 0 | -3.135443  | 3.868179  | 1.552887  | 128 | 1 | 0 | 5.911410  | 0.067609  | -5.298863 |     |   |   |           |           |           |
| 46 | 1  | 0 | -3.955351  | 4.531626  | -0.331194 | 129 | 1 | 0 | 6.002370  | 1.792509  | -5.715963 |     |   |   |           |           |           |
| 47 | 1  | 0 | -2.611789  | 2.981973  | 3.447731  | 130 | 6 | 0 | 0.141801  | 0.983369  | -4.246628 |     |   |   |           |           |           |
| 48 | 1  | 0 | 0.861179   | 2.751089  | 5.564659  | 131 | 1 | 0 | 1.347582  | -0.673962 | -3.079588 |     |   |   |           |           |           |
| 49 | 6  | 0 | 1.139766   | 3.330223  | 4.671656  | 132 | 6 | 0 | 1.234142  | 3.140937  | -3.282500 |     |   |   |           |           |           |
| 50 | 6  | 0 | 0.418278   | 3.186210  | 3.485413  | 133 | 1 | 0 | 3.297839  | 3.136887  | -0.026415 |     |   |   |           |           |           |
| 51 | 6  | 0 | 2.224391   | 4.205228  | 4.726558  | 134 | 6 | 0 | 8.783483  | -5.191572 | 0.304940  |     |   |   |           |           |           |
| 52 | 6  | 0 | 0.767158   | 3.919573  | 2.344355  | 135 | 6 | 0 | 8.062179  | -4.846199 | -1.902650 |     |   |   |           |           |           |
| 53 | 1  | 0 | -0.405331  | 2.480151  | 3.438938  | 136 | 6 | 0 | 9.681119  | -3.255433 | -0.932221 |     |   |   |           |           |           |
| 54 | 6  | 0 | 2.593543   | 4.925752  | 3.588129  | 137 | 6 | 0 | 0.086459  | 2.350191  | -2.190971 |     |   |   |           |           |           |
| 55 | 1  | 0 | 2.790280   | 4.313695  | 5.646562  | 138 | 1 | 0 | -0.751092 | 0.386098  | -2.289400 |     |   |   |           |           |           |
| 56 | 6  | 0 | 0.019017   | 3.738783  | 1.047473  | 139 | 8 | 0 | 1.096295  | 4.482317  | -2.106744 |     |   |   |           |           |           |
| 57 | 6  | 0 | 1.873550   | 4.780264  | 2.403196  | 140 | 6 | 0 | 9.107216  | -4.528177 | -0.943180 |     |   |   |           |           |           |
| 58 | 1  | 0 | 3.454626   | 5.586721  | 3.620415  | 141 | 8 | 0 | -1.074771 | 2.927718  | -1.698910 |     |   |   |           |           |           |
| 59 | 1  | 0 | 2.175832   | 5.323207  | 1.511846  | 142 | 6 | 0 | 2.260578  | 5.301522  | -2.191778 |     |   |   |           |           |           |
| 60 | 1  | 0 | -0.457573  | 5.772815  | 0.740400  | 143 | 6 | 0 | -2.137868 | 3.114820  | -2.647552 |     |   |   |           |           |           |
| 61 | 6  | 0 | 3.688261   | -0.624165 | 1.378550  | 144 | 6 | 0 | 1.888483  | 6.725750  | -1.842887 |     |   |   |           |           |           |
| 62 | 6  | 0 | 3.106558   | -1.896099 | 1.388518  | 145 | 1 | 0 | 3.036514  | 4.934625  | -1.507522 |     |   |   |           |           |           |
| 63 | 6  | 0 | 4.726972   | -0.299120 | 2.339438  | 146 | 1 | 0 | 2.665604  | 5.288473  | -3.212448 |     |   |   |           |           |           |
| 64 | 6  | 0 | 3.998628   | 0.034931  | 0.126863  | 147 | 6 | 0 | -2.131408 | 4.520152  | -3.213883 |     |   |   |           |           |           |
| 65 | 6  | 0 | 3.553433   | -2.894695 | 2.342910  | 148 | 1 | 0 | -3.070368 | 2.928897  | -2.108916 |     |   |   |           |           |           |
| 66 | 6  | 0 | 2.847013   | -2.559332 | 0.133755  | 149 | 1 | 0 | 2.052128  | 2.388720  | -3.462750 |     |   |   |           |           |           |
| 67 | 6  | 0 | 5.150435   | -1.252979 | 3.265269  | 150 | 1 | 0 | -0.457573 | 5.772815  | 0.740400  |     |   |   |           |           |           |
| 68 | 6  | 0 | 5.693843   | 0.565318  | 1.687997  | 151 | 1 | 0 | 3.688261  | -0.624165 | 1.378550  |     |   |   |           |           |           |
| 69 | 6  | 0 | 5.260875   | 0.782346  | 0.324413  | 152 | 8 | 0 | 3.106558  | -1.896099 | 1.388518  |     |   |   |           |           |           |
| 70 | 6  | 0 | 3.729617   | -0.584905 | -1.075791 | 153 | 8 | 0 | 4.726972  | -0.299120 | 2.339438  |     |   |   |           |           |           |
| 71 | 6  | 0 | 4.556901   | -2.580563 | 3.261937  | 154 | 1 | 0 | 3.998628  | 0.034931  | 0.126863  |     |   |   |           |           |           |
| 72 | 6  | 0 | 3.565204   | -4.183726 | 1.669780  | 155 | 1 | 0 | 3.553433  | -2.894695 | 2.342910  |     |   |   |           |           |           |
| 73 | 6  | 0 | 3.126345   | -3.976770 | 0.300763  | 156 | 6 | 0 | 2.847013  | -2.559332 | 0.133755  |     |   |   |           |           |           |
| 74 | 6  | 0 | 3.180026   | -1.915912 | -1.062895 | 157 | 6 | 0 | 5.150435  | -1.252979 | 3.265269  |     |   |   |           |           |           |
| 75 | 6  | 0 | 6.566119   | -1.391453 | 3.568835  | 158 | 1 | 0 | 5.693843  | 0.565318  | 1.687997  |     |   |   |           |           |           |
| 76 | 6  | 0 | 7.054632   | 0.438367  | 1.989593  | 159 | 1 | 0 | 5.260875  | 0.782346  | 0.324413  |     |   |   |           |           |           |
| 77 | 6  | 0 | 6.189384   | 0.846010  | -0.690490 | 160 | 6 | 0 | 3.729617  | -0.584905 | -1.075791 |     |   |   |           |           |           |
| 78 | 6  | 0 | 4.530141   | -0.352654 | -2.364672 | 161 | 1 | 0 | 4.556901  | -2.580563 | 3.261937  |     |   |   |           |           |           |
| 79 | 6  | 0 | 5.606103   | -3.538486 | 1.949928  | 162 | 1 | 0 | 3.565204  | -4.183726 | 1.669780  |     |   |   |           |           |           |
| 80 | 6  | 0 | 4.578831   | -5.104120 | 3.943680  | 163 | 6 | 0 | 3.126345  | -3.976770 | 0.300763  |     |   |   |           |           |           |

| AT1: CAM-B3LYP/6-31G(d,p) |        |        |                               | 84  | 6 | 0 | -5.955415 | 0.016098  | 1.684427  | 174 | 6 | 0 | 1.079671 | 7.317838  | -3.716060 |
|---------------------------|--------|--------|-------------------------------|-----|---|---|-----------|-----------|-----------|-----|---|---|----------|-----------|-----------|
| Standard orientation:     |        |        |                               | 85  | 6 | 0 | -2.201100 | 2.064752  | 2.275305  | 175 | 1 | 0 | 1.049776 | 10.297514 | -1.064793 |
|                           |        |        |                               | 86  | 6 | 0 | -4.300795 | 3.187857  | 2.504918  | 176 | 1 | 0 | 1.592622 | 8.643154  | -0.740794 |
|                           |        |        |                               | 87  | 6 | 0 | -6.940025 | -1.978142 | 2.769004  | 177 | 8 | 0 | 0.071968 | 8.795120  | -2.133022 |
|                           |        |        |                               | 88  | 6 | 0 | -5.419652 | -3.852442 | 2.937381  | 178 | 6 | 0 | 0.896890 | 8.616921  | -3.221137 |
| Center                    | Atomic | Atomic | Coordinates (Angstroms)       | 89  | 6 | 0 | -2.647801 | -2.381127 | 1.328266  | 179 | 6 | 0 | 1.879527 | 7.128348  | -4.839387 |
| Number                    | Number | Type   | X Y Z                         | 90  | 6 | 0 | -4.052350 | -3.978477 | 2.476928  | 180 | 6 | 0 | 1.504058 | 9.694230  | -3.846312 |
| 1                         | 6      | 0      | 9.496080 0.551241 1.015341    | 91  | 6 | 0 | -4.501913 | 0.452671  | -0.086921 | 181 | 6 | 0 | 2.491161 | 8.216573  | -5.455914 |
| 2                         | 6      | 0      | 10.538553 -0.360617 1.034928  | 92  | 6 | 0 | -2.783467 | -1.106871 | 0.589985  | 182 | 1 | 0 | 2.041834 | 6.135628  | -5.238598 |
| 3                         | 6      | 0      | 10.443564 -1.582355 0.367425  | 93  | 6 | 0 | -5.868672 | 0.586954  | 0.371666  | 183 | 6 | 0 | 2.307318 | 9.499540  | -4.964807 |
| 4                         | 6      | 0      | 9.267501 -1.878166 -0.358034  | 94  | 6 | 0 | -7.068449 | -0.702426 | 2.029588  | 184 | 1 | 0 | 1.325018 | 10.691738 | -3.459022 |
| 5                         | 6      | 0      | 8.236664 -0.947584 -0.394833  | 95  | 6 | 0 | -1.691770 | 3.151165  | 1.592598  | 185 | 1 | 0 | 3.112477 | 8.049233  | -6.328693 |
| 6                         | 6      | 0      | 8.331407 0.266155 0.297456    | 96  | 1 | 0 | -1.576471 | 1.197464  | 2.456469  | 186 | 1 | 0 | 2.775542 | 10.347846 | -5.450587 |
| 7                         | 6      | 0      | 11.534575 -2.577648 0.331494  | 97  | 6 | 0 | -3.788554 | 4.300561  | 1.841616  |     |   |   |          |           |           |
| 8                         | 6      | 0      | 9.222887 -3.165655 -1.086191  | 98  | 1 | 0 | -5.330396 | 3.206419  | 2.847937  |     |   |   |          |           |           |
| 9                         | 6      | 0      | 10.515453 -3.525479 -1.712074 | 99  | 6 | 0 | -7.952717 | -2.872885 | 2.266292  |     |   |   |          |           |           |
| 10                        | 6      | 0      | 11.689901 -3.227665 -0.990617 | 100 | 6 | 0 | -6.390587 | -4.734008 | 2.479488  |     |   |   |          |           |           |
| 11                        | 6      | 0      | 12.929144 -3.504165 -1.566191 | 101 | 6 | 0 | -2.305055 | -3.401913 | 0.369880  |     |   |   |          |           |           |
| 12                        | 1      | 0      | 13.838017 -3.230517 -1.042385 | 102 | 6 | 0 | -3.712334 | -4.983833 | 1.579899  |     |   |   |          |           |           |
| 13                        | 6      | 0      | 13.017618 -4.091787 -2.822463 | 103 | 6 | 0 | -4.238528 | 0.225561  | -1.432333 |     |   |   |          |           |           |
| 14                        | 6      | 0      | 11.861741 -4.385501 -3.531445 | 104 | 6 | 0 | -2.511975 | -1.378885 | -0.800865 |     |   |   |          |           |           |
| 15                        | 6      | 0      | 10.619934 -4.090151 -2.982072 | 105 | 6 | 0 | -6.916999 | 0.476725  | -0.533318 |     |   |   |          |           |           |
| 16                        | 1      | 0      | 9.587807 1.497703 1.535732    | 106 | 6 | 0 | -8.157127 | -0.849358 | 1.095498  |     |   |   |          |           |           |
| 17                        | 1      | 0      | 11.454506 -0.101721 1.553009  | 107 | 8 | 0 | -0.391070 | 3.136707  | 1.111555  |     |   |   |          |           |           |
| 18                        | 1      | 0      | 7.351078 -1.140590 -0.988427  | 108 | 6 | 0 | -2.484595 | 4.283248  | 1.361462  |     |   |   |          |           |           |
| 19                        | 1      | 0      | 13.991865 -4.298222 -3.252520 | 109 | 1 | 0 | -4.422458 | 5.164152  | 1.688754  |     |   |   |          |           |           |
| 20                        | 1      | 0      | 11.922401 -4.824510 -4.521545 | 110 | 6 | 0 | -8.705240 | -2.182215 | 1.239262  |     |   |   |          |           |           |
| 21                        | 1      | 0      | 9.723356 -4.274371 -3.563342  | 111 | 6 | 0 | -7.692942 | -4.231367 | 2.135358  |     |   |   |          |           |           |
| 22                        | 16     | 0      | 6.616314 -3.611388 -0.246717  | 112 | 6 | 0 | -6.037344 | -5.772933 | 1.529850  |     |   |   |          |           |           |
| 23                        | 6      | 0      | 6.602669 -6.098329 -1.147403  | 113 | 6 | 0 | -2.814237 | -4.688469 | 0.496692  |     |   |   |          |           |           |
| 24                        | 6      | 0      | 5.926515 -5.213008 -0.4422915 | 114 | 6 | 0 | -2.216342 | -2.789993 | -0.940015 |     |   |   |          |           |           |
| 25                        | 1      | 0      | 6.281643 -7.113001 -1.344614  | 115 | 6 | 0 | -4.730754 | -5.894926 | 1.091118  |     |   |   |          |           |           |
| 26                        | 1      | 0      | 4.974865 -5.399949 0.057250   | 116 | 6 | 0 | -3.214705 | -0.715881 | -1.801024 |     |   |   |          |           |           |
| 27                        | 6      | 0      | 12.256011 -2.928739 1.423404  | 117 | 6 | 0 | -5.335276 | 0.097732  | -2.375034 |     |   |   |          |           |           |
| 28                        | 16     | 0      | 13.483934 -4.215477 1.419373  | 118 | 6 | 0 | -8.094311 | -0.259595 | -0.161249 |     |   |   |          |           |           |
| 29                        | 6      | 0      | 13.029626 -3.382824 3.888610  | 119 | 6 | 0 | -6.642068 | 0.218604  | -1.935094 |     |   |   |          |           |           |
| 30                        | 6      | 0      | 13.692662 -4.271888 3.156608  | 120 | 6 | 0 | -0.154041 | 2.171131  | 0.074965  |     |   |   |          |           |           |
| 31                        | 1      | 0      | 13.082610 -3.299999 4.966321  | 121 | 8 | 0 | -1.899066 | 5.295151  | 0.9657642 |     |   |   |          |           |           |
| 32                        | 1      | 0      | 14.366466 -5.021682 3.550538  | 122 | 6 | 0 | -9.160577 | -2.870535 | 0.127811  |     |   |   |          |           |           |
| 33                        | 16     | 0      | 8.118615 -5.585008 -1.858097  | 123 | 6 | 0 | -8.158117 | -4.950222 | 0.967021  |     |   |   |          |           |           |
| 34                        | 16     | 0      | 12.007993 -2.237738 3.044317  | 124 | 6 | 0 | -7.133556 | -5.905293 | 0.592313  |     |   |   |          |           |           |
| 35                        | 6      | 0      | 8.141099 -3.977651 -1.092245  | 125 | 6 | 0 | -3.270156 | -5.407428 | -0.675178 |     |   |   |          |           |           |
| 36                        | 6      | 0      | 7.262514 1.209639 0.244722    | 126 | 6 | 0 | -2.641014 | -3.480711 | -2.062714 |     |   |   |          |           |           |
| 37                        | 6      | 0      | 6.358426 2.011169 0.198958    | 127 | 6 | 0 | -4.455974 | -6.156190 | -0.307011 |     |   |   |          |           |           |
| 38                        | 6      | 0      | 5.295470 2.957941 0.148076    | 128 | 6 | 0 | -3.669433 | -1.440212 | -2.970494 |     |   |   |          |           |           |
| 39                        | 6      | 0      | 4.165490 2.725865 -0.648959   | 129 | 6 | 0 | -4.981769 | -0.936054 | -3.326129 |     |   |   |          |           |           |
| 40                        | 6      | 0      | 5.364237 4.149122 0.883840    | 130 | 6 | 0 | -8.559145 | -0.983268 | -1.326938 |     |   |   |          |           |           |
| 41                        | 6      | 0      | 3.132675 3.648805 -0.696372   | 131 | 6 | 0 | -7.660609 | -0.686510 | -2.425697 |     |   |   |          |           |           |
| 42                        | 1      | 0      | 4.115822 1.817952 -1.239408   | 132 | 6 | 0 | -0.753034 | 2.583867  | -1.247767 |     |   |   |          |           |           |
| 43                        | 6      | 0      | 4.328190 5.067009 0.830559    | 133 | 1 | 0 | 0.930104  | 2.079372  | -0.000990 |     |   |   |          |           |           |
| 44                        | 1      | 0      | 6.242081 4.348568 1.487325    | 134 | 1 | 0 | -0.567816 | 1.202781  | 0.369786  |     |   |   |          |           |           |
| 45                        | 6      | 0      | 3.191812 4.824139 0.055575    | 135 | 6 | 0 | -2.674406 | 6.453729  | 0.390968  |     |   |   |          |           |           |
| 46                        | 1      | 0      | 2.270946 3.469014 -1.331058   | 136 | 6 | 0 | -9.078517 | -2.260091 | -1.185763 |     |   |   |          |           |           |
| 47                        | 1      | 0      | 4.413549 5.993854 1.391248    | 137 | 6 | 0 | -8.875292 | -4.285609 | -0.014888 |     |   |   |          |           |           |
| 48                        | 1      | 0      | -0.574065 3.384493 5.878132   | 138 | 6 | 0 | -6.872855 | -6.152130 | -0.746581 |     |   |   |          |           |           |
| 49                        | 6      | 0      | -0.593751 4.261659 5.240317   | 139 | 6 | 0 | -3.184894 | -4.818627 | -1.927091 |     |   |   |          |           |           |
| 50                        | 6      | 0      | 0.393060 4.436341 4.276702    | 140 | 6 | 0 | -3.390506 | -2.792254 | -3.097100 |     |   |   |          |           |           |
| 51                        | 6      | 0      | -1.593969 5.213320 5.391126   | 141 | 6 | 0 | -5.503547 | -6.280056 | -1.206417 |     |   |   |          |           |           |
| 52                        | 6      | 0      | 0.393725 5.568199 3.465579    | 142 | 6 | 0 | -5.954674 | -1.807247 | -3.792801 |     |   |   |          |           |           |
| 53                        | 1      | 0      | 1.172492 3.689528 4.159943    | 143 | 6 | 0 | -7.323772 | -1.679274 | -3.333247 |     |   |   |          |           |           |
| 54                        | 6      | 0      | -1.603121 6.343870 4.579724   | 144 | 1 | 0 | -1.817786 | 2.822480  | -1.118555 |     |   |   |          |           |           |
| 55                        | 1      | 0      | -2.362757 5.080065 6.144681   | 145 | 1 | 0 | -0.690095 | 1.733353  | -1.942723 |     |   |   |          |           |           |
| 56                        | 6      | 0      | 1.490934 5.763685 2.454695    | 146 | 8 | 0 | -0.049103 | 3.697128  | -1.768627 |     |   |   |          |           |           |
| 57                        | 6      | 0      | -0.611048 6.524563 3.626027   | 147 | 6 | 0 | -1.820863 | 7.414058  | -0.395116 |     |   |   |          |           |           |
| 58                        | 1      | 0      | -2.377864 7.093419 4.702208   | 148 | 1 | 0 | -2.997329 | 6.916704  | 1.330625  |     |   |   |          |           |           |
| 59                        | 7      | 0      | 1.007187 5.632993 1.043253    | 149 | 1 | 0 | -3.562403 | 6.191051  | -0.197532 |     |   |   |          |           |           |
| 60                        | 1      | 0      | 1.935714 6.759733 2.535122    | 150 | 6 | 0 | -8.731253 | -3.294231 | -2.135563 |     |   |   |          |           |           |
| 61                        | 1      | 0      | 2.283108 5.028471 2.591221    | 151 | 6 | 0 | -8.605456 | -4.546002 | -1.411861 |     |   |   |          |           |           |
| 62                        | 1      | 0      | -0.623495 7.409754 2.996720   | 152 | 6 | 0 | -7.625820 | -5.458522 | -1.771044 |     |   |   |          |           |           |
| 63                        | 6      | 0      | 2.073001 5.826162 -0.005903   | 153 | 6 | 0 | -4.276717 | -4.951257 | -2.866640 |     |   |   |          |           |           |
| 64                        | 1      | 0      | 0.282136 6.353488 -0.871324   | 154 | 6 | 0 | -4.403227 | -3.699365 | -3.590422 |     |   |   |          |           |           |
| 65                        | 1      | 0      | 0.523213 4.719985 0.927545    | 155 | 6 | 0 | -5.411563 | -5.665101 | -2.514729 |     |   |   |          |           |           |
| 66                        | 1      | 0      | 1.548927 5.795075 -0.962614   | 156 | 6 | 0 | -5.658619 | -3.218433 | -3.929432 |     |   |   |          |           |           |
| 67                        | 1      | 0      | 2.457714 6.836827 0.147400    | 157 | 6 | 0 | -7.872813 | -3.011580 | -3.186488 |     |   |   |          |           |           |
| 68                        | 1      | 0      | -3.716534 0.987009 6.017690   | 158 | 6 | 0 | -0.609221 | 4.150627  | -2.985209 |     |   |   |          |           |           |
| 69                        | 6      | 0      | -2.842507 0.757386 5.383781   | 159 | 8 | 0 | -0.749161 | 7.865265  | 0.439491  |     |   |   |          |           |           |
| 70                        | 7      | 0      | -3.211369 0.064101 4.163350   | 160 | 1 | 0 | -1.419176 | 6.948147  | -1.298192 |     |   |   |          |           |           |
| 71                        | 1      | 0      | -2.154715 0.136139 5.962460   | 161 |   |   |           |           |           |     |   |   |          |           |           |



| AT2: CAM-B3LYP/6-31G(d,p) |               |             |                         | Standard orientation: |           |     |   |   |            |           |           |     |   |   |          |          |           |
|---------------------------|---------------|-------------|-------------------------|-----------------------|-----------|-----|---|---|------------|-----------|-----------|-----|---|---|----------|----------|-----------|
| Center Number             | Atomic Number | Atomic Type | Coordinates (Angstroms) |                       |           | X   | Y | Z |            |           |           |     |   |   |          |          |           |
| 1                         | 6             | 0           | 10.137139               | -2.966587             | 0.705480  | 84  | 6 | 0 | -7.643577  | 1.630549  | 1.288196  | 174 | 6 | 0 | 5.167547 | 2.124996 | -2.060540 |
| 2                         | 6             | 0           | 11.376986               | -3.576032             | 0.603898  | 85  | 6 | 0 | -2.685507  | 1.510985  | 1.069875  | 175 | 1 | 0 | 4.499287 | 5.474941 | -3.058622 |
| 3                         | 6             | 0           | 12.554806               | -2.828506             | 0.633171  | 86  | 6 | 0 | -4.081666  | 2.785299  | -0.382151 | 176 | 1 | 0 | 3.112101 | 5.872536 | -2.019258 |
| 4                         | 6             | 0           | 12.473377               | -1.426576             | 0.790062  | 87  | 6 | 0 | -8.474340  | 0.171857  | 3.097892  | 177 | 8 | 0 | 4.129363 | 4.204968 | -1.465172 |
| 5                         | 6             | 0           | 11.227477               | -0.824957             | 0.915684  | 88  | 6 | 0 | -7.686229  | -2.107121 | 2.949016  | 178 | 6 | 0 | 5.280970 | 3.485206 | -1.751297 |
| 6                         | 6             | 0           | 10.049447               | -1.580782             | 0.863744  | 89  | 6 | 0 | -5.817119  | -1.785422 | -0.025211 | 179 | 6 | 0 | 6.324552 | 1.383331 | -2.277283 |
| 7                         | 6             | 0           | 13.902764               | -3.428802             | 0.562585  | 90  | 6 | 0 | -6.843622  | -2.733202 | 1.952145  | 180 | 6 | 0 | 6.522550 | 4.090622 | -1.664033 |
| 8                         | 6             | 0           | 13.746432               | -0.675542             | 0.861504  | 91  | 6 | 0 | -7.224172  | 1.459172  | -0.999484 | 181 | 6 | 0 | 7.570818 | 1.997951 | -2.190710 |
| 9                         | 6             | 0           | 14.797606               | -1.384330             | 1.626455  | 92  | 6 | 0 | -5.930125  | -0.576821 | -0.869988 | 182 | 1 | 0 | 6.270742 | 0.326070 | -2.500701 |
| 10                        | 6             | 0           | 14.877913               | -2.783659             | 1.472371  | 93  | 6 | 0 | -8.069700  | 2.083925  | -0.004564 | 183 | 6 | 0 | 7.676952 | 3.347777 | -1.889568 |
| 11                        | 6             | 0           | 15.820136               | -3.495564             | 2.213134  | 94  | 6 | 0 | -8.584546  | 1.376356  | 2.247969  | 184 | 1 | 0 | 6.572947 | 5.143109 | -1.404673 |
| 12                        | 1             | 0           | 15.854698               | -4.576774             | 2.141821  | 95  | 6 | 0 | -1.619162  | 1.687718  | 0.202673  | 185 | 1 | 0 | 8.463130 | 1.403574 | -2.352500 |
| 13                        | 6             | 0           | 16.692587               | -2.841563             | 3.074771  | 96  | 1 | 0 | -2.519247  | 0.990656  | 2.005724  | 186 | 1 | 0 | 8.649488 | 3.820630 | -1.817281 |
| 14                        | 6             | 0           | 16.613415               | -1.464604             | 3.225554  | 97  | 6 | 0 | -3.016060  | 2.987290  | -1.251416 |     |   |   |          |          |           |
| 15                        | 6             | 0           | 15.661178               | -0.744808             | 2.513983  | 98  | 1 | 0 | -5.037782  | 3.237041  | -0.623559 |     |   |   |          |          |           |
| 16                        | 1             | 0           | 9.232098                | -3.563036             | 0.688594  | 99  | 6 | 0 | -9.809366  | -0.324557 | 3.321445  |     |   |   |          |          |           |
| 17                        | 1             | 0           | 11.428521               | -4.656321             | 0.534552  | 100 | 6 | 0 | -8.961103  | -2.605900 | 3.186448  |     |   |   |          |          |           |
| 18                        | 1             | 0           | 11.154269               | 0.242237              | 1.088246  | 101 | 6 | 0 | -6.312673  | -2.902288 | -0.791097 |     |   |   |          |          |           |
| 19                        | 1             | 0           | 17.417759               | -3.414276             | 3.642916  | 102 | 6 | 0 | -7.305142  | -3.830540 | 1.236000  |     |   |   |          |          |           |
| 20                        | 1             | 0           | 17.276123               | -0.949270             | 3.912486  | 103 | 6 | 0 | -7.754915  | 1.094346  | -2.230143 |     |   |   |          |          |           |
| 21                        | 1             | 0           | 15.570356               | 0.323365              | 2.676587  | 104 | 6 | 0 | -6.490759  | -0.987459 | -2.134791 |     |   |   |          |          |           |
| 22                        | 16            | 0           | 12.741365               | 1.298889              | -0.809771 | 105 | 6 | 0 | -9.411708  | 2.316036  | -0.280979 |     |   |   |          |          |           |
| 23                        | 6             | 0           | 15.100749               | 2.463198              | -1.082272 | 106 | 6 | 0 | -9.984339  | 1.587868  | 1.973594  |     |   |   |          |          |           |
| 24                        | 6             | 0           | 13.850979               | 2.447449              | -1.533424 | 107 | 8 | 0 | -0.374843  | 1.179701  | 0.536458  |     |   |   |          |          |           |
| 25                        | 1             | 0           | 15.877575               | 3.130725              | -1.432289 | 108 | 6 | 0 | -1.771475  | 2.427306  | -0.975745 |     |   |   |          |          |           |
| 26                        | 1             | 0           | 13.461178               | 3.098805              | -2.304719 | 109 | 1 | 0 | -3.170725  | 3.582677  | -2.141688 |     |   |   |          |          |           |
| 27                        | 6             | 0           | 14.235632               | -4.407230             | -0.313341 | 110 | 6 | 0 | -10.741427 | 0.544879  | 2.634019  |     |   |   |          |          |           |
| 28                        | 16            | 0           | 15.885063               | -5.048284             | -0.492349 | 111 | 6 | 0 | -10.053144 | -1.690560 | 3.380326  |     |   |   |          |          |           |
| 29                        | 6             | 0           | 14.314830               | -5.999983             | -2.396623 | 112 | 6 | 0 | -9.449763  | -3.741807 | 2.426167  |     |   |   |          |          |           |
| 30                        | 6             | 0           | 15.565077               | -5.967202             | -1.947564 | 113 | 6 | 0 | -7.033206  | -3.917515 | -0.173458 |     |   |   |          |          |           |
| 31                        | 1             | 0           | 13.981802               | -6.541963             | -3.272098 | 114 | 6 | 0 | -6.725246  | -2.415988 | -2.091261 |     |   |   |          |          |           |
| 32                        | 1             | 0           | 16.402220               | -6.479096             | -2.404263 | 115 | 6 | 0 | -8.642081  | -4.340736 | 1.475374  |     |   |   |          |          |           |
| 33                        | 16            | 0           | 15.525121               | 1.337179              | 0.189649  | 116 | 6 | 0 | -7.376729  | -0.163190 | -2.816444 |     |   |   |          |          |           |
| 34                        | 16            | 0           | 13.103958               | -5.118486             | -1.488274 | 117 | 6 | 0 | -9.159349  | 1.324403  | -2.512808 |     |   |   |          |          |           |
| 35                        | 6             | 0           | 13.958690               | 0.490481              | 0.210491  | 118 | 6 | 0 | -10.396738 | 2.063834  | 0.735753  |     |   |   |          |          |           |
| 36                        | 6             | 0           | 8.779748                | -0.943576             | 0.999369  | 119 | 6 | 0 | -9.968026  | 1.920695  | -1.561352 |     |   |   |          |          |           |
| 37                        | 6             | 0           | 7.704597                | -0.402790             | 1.116408  | 120 | 6 | 0 | -0.190490  | -0.208290 | 0.264773  |     |   |   |          |          |           |
| 38                        | 6             | 0           | 6.436653                | 0.236197              | 1.240732  | 121 | 8 | 0 | -0.665918  | 2.556892  | 1.770604  |     |   |   |          |          |           |
| 39                        | 6             | 0           | 6.351021                | 1.617812              | 1.460227  | 122 | 6 | 0 | -11.869800 | 0.016628  | 2.030055  |     |   |   |          |          |           |
| 40                        | 6             | 0           | 5.250770                | -0.504019             | 1.135919  | 123 | 6 | 0 | -11.226649 | -2.246052 | 2.738272  |     |   |   |          |          |           |
| 41                        | 6             | 0           | 5.115624                | 2.235398              | 1.557383  | 124 | 6 | 0 | -10.853578 | -3.516991 | 2.148490  |     |   |   |          |          |           |
| 42                        | 1             | 0           | 7.262168                | 2.196921              | 1.551674  | 125 | 6 | 0 | -8.200981  | -4.477716 | -0.822288 |     |   |   |          |          |           |
| 43                        | 6             | 0           | 4.018242                | 0.124415              | 1.225433  | 126 | 6 | 0 | -7.834429  | -2.958750 | -2.718285 |     |   |   |          |          |           |
| 44                        | 1             | 0           | 5.309319                | -1.576524             | 0.987296  | 127 | 6 | 0 | -9.196838  | -4.740809 | 0.198478  |     |   |   |          |          |           |
| 45                        | 6             | 0           | 3.934699                | 1.500995              | 1.428812  | 128 | 6 | 0 | -8.543502  | -0.727195 | -3.463487 |     |   |   |          |          |           |
| 46                        | 1             | 0           | 5.066100                | 3.305395              | 1.740755  | 129 | 6 | 0 | -9.647300  | 0.194295  | -3.276399 |     |   |   |          |          |           |
| 47                        | 1             | 0           | 3.110143                | -0.460061             | 1.124682  | 130 | 6 | 0 | -11.570285 | 1.504146  | 0.097239  |     |   |   |          |          |           |
| 48                        | 1             | 0           | 4.137034                | 7.275764              | 1.896450  | 131 | 6 | 0 | -11.305718 | 1.416555  | -1.325730 |     |   |   |          |          |           |
| 49                        | 6             | 0           | 3.206174                | 6.743029              | 2.060430  | 132 | 6 | 0 | 0.366947   | -0.439065 | -1.118338 |     |   |   |          |          |           |
| 50                        | 6             | 0           | 2.827769                | 5.732357              | 1.185854  | 133 | 1 | 0 | 0.513760   | -0.582262 | 1.013168  |     |   |   |          |          |           |
| 51                        | 6             | 0           | 2.394103                | 7.078921              | 3.138811  | 134 | 1 | 0 | -1.136610  | -0.746432 | 0.380899  |     |   |   |          |          |           |
| 52                        | 6             | 0           | 1.633243                | 5.035040              | 1.387751  | 135 | 6 | 0 | -0.776210  | 3.394329  | -2.910832 |     |   |   |          |          |           |
| 53                        | 1             | 0           | 3.473541                | 5.479049              | 0.350469  | 136 | 6 | 0 | -12.289989 | 0.502570  | 0.729252  |     |   |   |          |          |           |
| 54                        | 6             | 0           | 1.204204                | 6.393145              | 3.344324  | 137 | 6 | 0 | -12.115066 | -1.412180 | 2.078028  |     |   |   |          |          |           |
| 55                        | 1             | 0           | 2.690172                | 7.871998              | 3.816931  | 138 | 6 | 0 | -11.386063 | -3.896800 | 0.926286  |     |   |   |          |          |           |
| 56                        | 6             | 0           | 1.169885                | 3.956227              | 0.442404  | 139 | 6 | 0 | -8.593184  | -4.009675 | -2.066564 |     |   |   |          |          |           |
| 57                        | 6             | 0           | 0.830701                | 5.372937              | 2.476481  | 140 | 6 | 0 | -8.768328  | -2.094026 | -3.414071 |     |   |   |          |          |           |
| 58                        | 1             | 0           | 0.566309                | 6.646744              | 4.184139  | 141 | 6 | 0 | -10.538975 | -4.521784 | -0.070986 |     |   |   |          |          |           |
| 59                        | 7             | 0           | 2.170540                | 2.847195              | 0.255294  | 142 | 6 | 0 | -10.925002 | -0.293188 | -3.048601 |     |   |   |          |          |           |
| 60                        | 1             | 0           | 0.259894                | 3.488701              | 0.812037  | 143 | 6 | 0 | -11.772738 | 0.331756  | -2.051603 |     |   |   |          |          |           |
| 61                        | 1             | 0           | 0.983199                | 4.336170              | -0.562146 | 144 | 1 | 0 | -0.285650  | 0.013861  | -1.874468 |     |   |   |          |          |           |
| 62                        | 1             | 0           | -0.098559               | 4.836206              | 2.644201  | 145 | 1 | 0 | 0.422064   | -1.520781 | -1.309003 |     |   |   |          |          |           |
| 63                        | 6             | 0           | 2.608886                | 2.197954              | 1.542732  | 146 | 8 | 0 | 1.665334   | 0.130169  | -1.182052 |     |   |   |          |          |           |
| 64                        | 1             | 0           | 2.974578                | 3.216027              | -0.279832 | 147 | 6 | 0 | 0.554035   | 3.433823  | -3.617873 |     |   |   |          |          |           |
| 65                        | 1             | 0           | 1.753474                | 2.121154              | -0.349684 | 148 | 1 | 0 | -1.064414  | 4.408508  | -2.609728 |     |   |   |          |          |           |
| 66                        | 1             | 0           | 2.662266                | 2.995016              | 2.283781  | 149 | 1 | 0 | -1.535942  | 3.006365  | -3.600546 |     |   |   |          |          |           |
| 67                        | 1             | 0           | 1.800954                | 1.522409              | 1.823482  | 150 | 6 | 0 | -12.781478 | -0.626748 | -0.029398 |     |   |   |          |          |           |
| 68                        | 1             | 0           | -6.413398               | 1.869169              | 4.216098  | 151 | 6 | 0 | -12.673370 | -1.810190 | 0.804035  |     |   |   |          |          |           |
| 69                        | 6             | 0           | -5.318499               | 1.944545              | 4.181064  | 152 | 6 | 0 | -12.317030 | -3.024886 | 0.239593  |     |   |   |          |          |           |
| 70                        | 7             | 0           | -4.707543               | 1.307466              | 3.018543  | 153 | 6 | 0 | -9.994341  | -3.786240 | -2.348916 |     |   |   |          |          |           |
| 71                        | 1             | 0           | -4.916009               | 1.489540              | 5.088681  | 154 | 6 | 0 | -10.102328 | -2.602470 | -3.181996 |     |   |   |          |          |           |
| 72                        | 1             | 0           | -5.046820               | 3.002542              | 4.195161  | 155 | 6 | 0 | -10.946575 | -4.034994 | -1.372742 |     |   |   |          |          |           |
| 73                        | 6             | 0           | -4.900371               | -0.125605             | 2.933551  | 156 | 6 | 0 | -11.157740 | -1.722003 | -3.001901 |     |   |   |          |          |           |
| 74                        | 6             | 0           | -5.117445               | 1.856960              | 1.735652  | 157 | 6 | 0 | -12.528482 | -0.711566 | -1.389710 |     |   |   |          |          |           |
| 75                        | 6             | 0           | -6.184413               | -0.397780             | 2.088614  | 158 | 6 | 0 | 2.277373   | -0.083604 | -2.439080 |     |   |   |          |          |           |
| 76                        | 1             | 0           | -4.054221               | -0.581573             | 2.408249  | 159 | 8 | 0 | 1.510462   | 4.059513  | -2.792929 |     |   |   |          |          |           |
| 77                        | 1             | 0           | -4.953983               | -0.576482             | 3.925993  | 160 | 1 | 0 | 0.874101   | 2.416249  | -3.881913 |     |   |   |          |          |           |
| 78                        | 6             | 0           | -6.293425               | 0.913981              | 1.184299  | 161 | 1 | 0 | 0.424818   | 3.996712  | -4.554108 |     |   |   |          |          |           |
| 79                        | 1             | 0           | -5.543663               | 2.850046              | 0.898669  | 162 | 6 | 0 | -12.046890 | -3.110625 | -1.181974 |     |   |   |          |          |           |
| 80                        | 6             | 0           | -3.942935               | 2.033450              | 0.781627  | 163 | 6 | 0 | -12.150124 | -1.981311 | -1.977528 |     |   |   |          |          |           |

| AT4: CAM-B3LYP/6-31G(d,p) |        |        |                         |   |   | 84  | 6 | 0 | 5.855783  | 0.779814  | 0.796221  | 174   | 6 | 0 | -4.526645 | 4.018735 | 2.199743 |
|---------------------------|--------|--------|-------------------------|---|---|-----|---|---|-----------|-----------|-----------|-------|---|---|-----------|----------|----------|
| Standard orientation:     |        |        |                         |   |   | 85  | 6 | 0 | 3.046873  | 3.309590  | -1.360964 | 175   | 1 | 0 | -4.500188 | 8.095943 | 1.658464 |
| Center                    | Atomic | Atomic | Coordinates (Angstroms) |   |   | 86  | 6 | 0 | 4.198189  | 4.081251  | 0.592636  | 176   | 1 | 0 | -4.029283 | 7.024570 | 0.324629 |
| Number                    | Number | Type   | X                       | Y | Z | 87  | 6 | 0 | 7.898906  | -0.398341 | 0.044749  | 177   | 8 | 0 | -3.709674 | 6.241001 | 2.210757 |
|                           |        |        |                         |   |   | 88  | 6 | 0 | 7.610242  | -1.647615 | -2.007187 | 178   | 6 | 0 | -4.793566 | 5.397478 | 2.265062 |
|                           |        |        |                         |   |   | 89  | 6 | 0 | 4.192079  | -0.952448 | -2.526786 | 179   | 6 | 0 | -5.578587 | 3.117747 | 2.327855 |
|                           |        |        |                         |   |   | 90  | 6 | 0 | 6.427638  | -1.822786 | -2.824407 | 180   | 6 | 0 | -6.091292 | 5.849399 | 2.432252 |
|                           |        |        |                         |   |   | 91  | 6 | 0 | 3.562577  | 0.355557  | 0.843984  | 181   | 6 | 0 | -6.882296 | 3.583229 | 2.493869 |
|                           |        |        |                         |   |   | 92  | 6 | 0 | 3.371065  | -0.327619 | -1.466897 | 182   | 1 | 0 | -5.402780 | 2.050062 | 2.292130 |
|                           |        |        |                         |   |   | 93  | 6 | 0 | 4.740984  | 0.536729  | 1.665408  | 183   | 6 | 0 | -7.143029 | 4.942082 | 2.540109 |
|                           |        |        |                         |   |   | 94  | 6 | 0 | 7.072153  | 0.228855  | 1.100026  | 184   | 1 | 0 | -6.281050 | 6.915345 | 2.494326 |
|                           |        |        |                         |   |   | 95  | 6 | 0 | 1.897908  | 3.937957  | -0.926927 | 185   | 1 | 0 | -7.689497 | 2.865008 | 2.585780 |
|                           |        |        |                         |   |   | 96  | 1 | 0 | 3.048374  | 2.760564  | -2.295732 | 186   | 1 | 0 | -8.156269 | 5.304568 | 2.670085 |
|                           |        |        |                         |   |   | 97  | 6 | 0 | 3.046516  | 4.734328  | 1.030136  | ----- |   |   |           |          |          |
|                           |        |        |                         |   |   | 98  | 1 | 0 | 5.097080  | 4.136210  | 1.198804  |       |   |   |           |          |          |
|                           |        |        |                         |   |   | 99  | 6 | 0 | 8.546908  | -1.546890 | 0.627325  |       |   |   |           |          |          |
|                           |        |        |                         |   |   | 100 | 6 | 0 | 8.255250  | -2.755058 | -1.471616 |       |   |   |           |          |          |
|                           |        |        |                         |   |   | 101 | 6 | 0 | 3.668213  | -2.276041 | -2.755583 |       |   |   |           |          |          |
|                           |        |        |                         |   |   | 102 | 6 | 0 | 5.941159  | -3.099866 | -3.075115 |       |   |   |           |          |          |
|                           |        |        |                         |   |   | 103 | 6 | 0 | 2.572979  | -0.538680 | 1.234878  |       |   |   |           |          |          |
|                           |        |        |                         |   |   | 104 | 6 | 0 | 2.361130  | -1.282255 | -1.079274 |       |   |   |           |          |          |
|                           |        |        |                         |   |   | 105 | 6 | 0 | 4.886071  | -0.192332 | 2.839178  |       |   |   |           |          |          |
|                           |        |        |                         |   |   | 106 | 6 | 0 | 7.237406  | -0.551985 | 2.301159  |       |   |   |           |          |          |
|                           |        |        |                         |   |   | 107 | 8 | 0 | 0.721500  | 3.884537  | -1.654517 |       |   |   |           |          |          |
|                           |        |        |                         |   |   | 108 | 6 | 0 | 1.882861  | 4.654492  | 0.277877  |       |   |   |           |          |          |
|                           |        |        |                         |   |   | 109 | 1 | 0 | 3.069863  | 5.297241  | 1.954515  |       |   |   |           |          |          |
|                           |        |        |                         |   |   | 110 | 6 | 0 | 8.145092  | -1.643891 | 2.015244  |       |   |   |           |          |          |
|                           |        |        |                         |   |   | 111 | 6 | 0 | 8.738180  | -2.703611 | -0.118297 |       |   |   |           |          |          |
|                           |        |        |                         |   |   | 112 | 6 | 0 | 7.736681  | -4.087066 | -1.721076 |       |   |   |           |          |          |
|                           |        |        |                         |   |   | 113 | 6 | 0 | 4.523030  | -3.333829 | -3.040263 |       |   |   |           |          |          |
|                           |        |        |                         |   |   | 114 | 6 | 0 | 2.540337  | -2.482127 | -1.870460 |       |   |   |           |          |          |
|                           |        |        |                         |   |   | 115 | 6 | 0 | 6.607840  | -4.255244 | -2.503526 |       |   |   |           |          |          |
|                           |        |        |                         |   |   | 116 | 6 | 0 | 1.954142  | -1.381380 | 0.246494  |       |   |   |           |          |          |
|                           |        |        |                         |   |   | 117 | 6 | 0 | 2.731903  | -1.309486 | 2.454988  |       |   |   |           |          |          |
|                           |        |        |                         |   |   | 118 | 6 | 0 | 6.169475  | -0.750477 | 3.167768  |       |   |   |           |          |          |
|                           |        |        |                         |   |   | 119 | 6 | 0 | 3.861597  | -1.140968 | 3.236645  |       |   |   |           |          |          |
|                           |        |        |                         |   |   | 120 | 6 | 0 | 0.116775  | 2.577680  | -1.744510 |       |   |   |           |          |          |
|                           |        |        |                         |   |   | 121 | 8 | 0 | 0.691486  | 5.226040  | 0.598948  |       |   |   |           |          |          |
|                           |        |        |                         |   |   | 122 | 6 | 0 | 7.947496  | -2.884012 | 2.597841  |       |   |   |           |          |          |
|                           |        |        |                         |   |   | 123 | 6 | 0 | 8.519280  | -4.001580 | 0.486353  |       |   |   |           |          |          |
|                           |        |        |                         |   |   | 124 | 6 | 0 | 7.900242  | -4.858713 | -0.506039 |       |   |   |           |          |          |
|                           |        |        |                         |   |   | 125 | 6 | 0 | 4.295854  | -4.632656 | -2.440708 |       |   |   |           |          |          |
|                           |        |        |                         |   |   | 126 | 6 | 0 | 2.315312  | -3.726368 | -1.305705 |       |   |   |           |          |          |
|                           |        |        |                         |   |   | 127 | 6 | 0 | 5.586697  | -5.204269 | -2.109705 |       |   |   |           |          |          |
|                           |        |        |                         |   |   | 128 | 6 | 0 | 1.728885  | -2.682863 | 0.841633  |       |   |   |           |          |          |
|                           |        |        |                         |   |   | 129 | 6 | 0 | 2.210204  | -2.638153 | 2.208741  |       |   |   |           |          |          |
|                           |        |        |                         |   |   | 130 | 6 | 0 | 5.954045  | -2.050986 | 3.768891  |       |   |   |           |          |          |
|                           |        |        |                         |   |   | 131 | 6 | 0 | 4.524998  | -2.292502 | 3.812065  |       |   |   |           |          |          |
|                           |        |        |                         |   |   | 132 | 6 | 0 | -0.167463 | 1.932947  | -0.407051 |       |   |   |           |          |          |
|                           |        |        |                         |   |   | 133 | 1 | 0 | -0.809660 | 2.725315  | -2.300607 |       |   |   |           |          |          |
|                           |        |        |                         |   |   | 134 | 1 | 0 | 0.776882  | 1.919423  | -2.318776 |       |   |   |           |          |          |
|                           |        |        |                         |   |   | 135 | 6 | 0 | 0.567570  | 5.913149  | 1.833009  |       |   |   |           |          |          |
|                           |        |        |                         |   |   | 136 | 6 | 0 | 6.822043  | -3.094254 | 3.488935  |       |   |   |           |          |          |
|                           |        |        |                         |   |   | 137 | 6 | 0 | 8.132974  | -4.090654 | 1.814268  |       |   |   |           |          |          |
|                           |        |        |                         |   |   | 138 | 6 | 0 | 6.922519  | -5.764752 | -0.125663 |       |   |   |           |          |          |
|                           |        |        |                         |   |   | 139 | 6 | 0 | 3.216203  | -4.826143 | -1.593415 |       |   |   |           |          |          |
|                           |        |        |                         |   |   | 140 | 6 | 0 | 1.907775  | -3.829221 | 0.082956  |       |   |   |           |          |          |
|                           |        |        |                         |   |   | 141 | 6 | 0 | 5.739572  | -5.941031 | -0.945613 |       |   |   |           |          |          |
|                           |        |        |                         |   |   | 142 | 6 | 0 | 2.846591  | -3.742429 | 2.755349  |       |   |   |           |          |          |
|                           |        |        |                         |   |   | 143 | 6 | 0 | 4.029411  | -3.565631 | 3.574872  |       |   |   |           |          |          |
|                           |        |        |                         |   |   | 144 | 1 | 0 | 0.738858  | 1.935917  | 0.214002  |       |   |   |           |          |          |
|                           |        |        |                         |   |   | 145 | 1 | 0 | -0.422821 | 0.878637  | -0.594885 |       |   |   |           |          |          |
|                           |        |        |                         |   |   | 146 | 8 | 0 | -1.231440 | 2.593656  | 0.239860  |       |   |   |           |          |          |
|                           |        |        |                         |   |   | 147 | 6 | 0 | -0.891365 | 6.235515  | 2.018835  |       |   |   |           |          |          |
|                           |        |        |                         |   |   | 148 | 1 | 0 | 1.183517  | 6.819104  | 1.179237  |       |   |   |           |          |          |
|                           |        |        |                         |   |   | 149 | 1 | 0 | 0.890497  | 5.272230  | 2.662816  |       |   |   |           |          |          |
|                           |        |        |                         |   |   | 150 | 6 | 0 | 6.305403  | -4.423470 | 3.246694  |       |   |   |           |          |          |
|                           |        |        |                         |   |   | 151 | 6 | 0 | 7.115408  | -5.038902 | 2.211426  |       |   |   |           |          |          |
|                           |        |        |                         |   |   | 152 | 6 | 0 | 6.522268  | -5.857622 | 1.263109  |       |   |   |           |          |          |
|                           |        |        |                         |   |   | 153 | 6 | 0 | 3.375151  | -5.598620 | -0.380710 |       |   |   |           |          |          |
|                           |        |        |                         |   |   | 154 | 6 | 0 | 2.565928  | -4.982881 | 0.655241  |       |   |   |           |          |          |
|                           |        |        |                         |   |   | 155 | 6 | 0 | 4.609311  | -6.143467 | -0.062583 |       |   |   |           |          |          |
|                           |        |        |                         |   |   | 156 | 6 | 0 | 3.026902  | -4.940877 | 1.962094  |       |   |   |           |          |          |
|                           |        |        |                         |   |   | 157 | 6 | 0 | 4.939414  | -4.655277 | 3.287892  |       |   |   |           |          |          |
|                           |        |        |                         |   |   | 158 | 6 | 0 | -1.457022 | 2.121645  | 1.550484  |       |   |   |           |          |          |
|                           |        |        |                         |   |   | 159 | 8 | 0 | -1.325562 | 7.135149  | 0.984880  |       |   |   |           |          |          |
|                           |        |        |                         |   |   | 160 | 1 | 0 | -1.494900 | 5.327549  | 1.996039  |       |   |   |           |          |          |
|                           |        |        |                         |   |   | 161 | 1 | 0 | -1.027067 | 6.714448  | 2.994441  |       |   |   |           |          |          |
|                           |        |        |                         |   |   | 162 | 6 | 0 | 5.092509  | -6.092948 | 1.303107  |       |   |   |           |          |          |
|                           |        |        |                         |   |   | 163 | 6 | 0 | 4.319707  | -5.507172 | 2.922116  |       |   |   |           |          |          |
|                           |        |        |                         |   |   | 164 | 1 | 0 | -1.221942 | 1.050454  | 1.625103  |       |   |   |           |          |          |
|                           |        |        |                         |   |   | 165 | 1 | 0 | -0.816967 | 2.653685  | 2.269007  |       |   |   |           |          |          |
|                           |        |        |                         |   |   | 166 | 6 | 0 | -2.912487 | 2.286078  | 1.915263  |       |   |   |           |          |          |
|                           |        |        |                         |   |   | 167 | 6 | 0 | -2.390859 | 8.001836  | 1.359723  |       |   |   |           |          |          |
|                           |        |        |                         |   |   | 168 | 1 | 0 | -3.104623 | 1.803017  | 2.882125  |       |   |   |           |          |          |
|                           |        |        |                         |   |   | 169 | 1 | 0 | -3.524697 | 1.793542  | 1.151716  |       |   |   |           |          |          |
|                           |        |        |                         |   |   | 170 | 8 | 0 | -3.223590 | 3.667333  | 1.990301  |       |   |   |           |          |          |
|                           |        |        |                         |   |   | 171 | 1 | 0 | -2.193127 | 8.400824  | 2.361824  |       |   |   |           |          |          |
|                           |        |        |                         |   |   | 172 | 1 | 0 | -2.381944 | 8.838840  | 0.654928  |       |   |   |           |          |          |
|                           |        |        |                         |   |   | 173 | 6 | 0 | -3.760455 | 7.350385  | 1.337545  |       |   |   |           |          |          |





| AT1: M06-2X/6-31G(d,p) |               |             | Standard orientation:            |           |           |     |   |   |           |           |           |     |   |   |           |           |           |
|------------------------|---------------|-------------|----------------------------------|-----------|-----------|-----|---|---|-----------|-----------|-----------|-----|---|---|-----------|-----------|-----------|
| Center Number          | Atomic Number | Atomic Type | Coordinates (Angstroms)<br>X Y Z |           |           |     |   |   |           |           |           |     |   |   |           |           |           |
| 1                      | 6             | 0           | 8.927793                         | 1.250167  | 0.885455  | 84  | 6 | 0 | -5.557674 | -0.642012 | 1.747067  | 174 | 6 | 0 | -0.419056 | 7.890244  | -3.492121 |
| 2                      | 6             | 0           | 9.994154                         | 0.364857  | 0.940181  | 85  | 6 | 0 | -2.277254 | 1.895693  | 2.500000  | 175 | 1 | 0 | -0.291765 | 10.433693 | -0.696346 |
| 3                      | 6             | 0           | 9.950278                         | -0.861114 | 0.270156  | 86  | 6 | 0 | -4.540809 | 2.652854  | 2.732706  | 176 | 1 | 0 | 0.185631  | 8.719779  | -0.738597 |
| 4                      | 6             | 0           | 8.807629                         | -1.186020 | -0.499459 | 87  | 6 | 0 | -6.274082 | -2.816154 | 2.689825  | 177 | 8 | 0 | -1.524415 | 9.182678  | -1.805575 |
| 5                      | 6             | 0           | 7.753111                         | -0.281276 | -0.573679 | 88  | 6 | 0 | -4.486840 | -4.442963 | 2.868621  | 178 | 6 | 0 | -0.839436 | 9.134316  | -2.999573 |
| 6                      | 6             | 0           | 7.794607                         | 0.932518  | 0.127030  | 89  | 6 | 0 | -1.893254 | -2.478001 | 1.492671  | 179 | 6 | 0 | 0.266504  | 7.835466  | -4.703743 |
| 7                      | 6             | 0           | 11.059502                        | -1.834963 | 0.286710  | 90  | 6 | 0 | -3.092772 | -4.333159 | 2.484880  | 180 | 6 | 0 | -0.579438 | 10.296774 | -3.708387 |
| 8                      | 6             | 0           | 8.817001                         | -2.476811 | -1.221101 | 91  | 6 | 0 | -4.095661 | 0.112744  | 0.089228  | 181 | 6 | 0 | 0.523770  | 9.010010  | -5.411208 |
| 9                      | 6             | 0           | 10.139553                        | -2.835665 | -1.780259 | 92  | 6 | 0 | -2.190074 | -1.203307 | 0.801625  | 182 | 1 | 0 | 0.610224  | 6.887855  | -5.101192 |
| 10                     | 6             | 0           | 11.278774                        | -2.511440 | -1.011940 | 93  | 6 | 0 | -5.491426 | 0.009923  | 0.469117  | 183 | 6 | 0 | 0.101597  | 10.239494 | -4.922687 |
| 11                     | 6             | 0           | 12.547539                        | -2.793872 | -1.521565 | 94  | 6 | 0 | -6.563965 | -1.538415 | 1.997177  | 184 | 1 | 0 | -0.936557 | 11.237575 | -3.301340 |
| 12                     | 1             | 0           | 13.429223                        | -2.493513 | -0.964110 | 95  | 6 | 0 | -1.971073 | 3.030110  | 1.773743  | 185 | 1 | 0 | 1.057995  | 8.951745  | -6.353207 |
| 13                     | 6             | 0           | 12.697011                        | -3.416566 | -2.753730 | 96  | 1 | 0 | -1.510420 | 1.145798  | 2.674419  | 186 | 1 | 0 | 0.297124  | 11.148774 | -5.479395 |
| 14                     | 6             | 0           | 11.574860                        | -3.736146 | -3.513382 | 97  | 6 | 0 | -4.230623 | 3.822666  | 2.037748  |     |   |   |           |           |           |
| 15                     | 6             | 0           | 10.305204                        | -3.431953 | -3.031682 | 98  | 1 | 0 | -5.558723 | 2.495400  | 3.078446  |     |   |   |           |           |           |
| 16                     | 1             | 0           | 8.974059                         | 2.199424  | 1.407720  | 99  | 6 | 0 | -7.106124 | -3.830170 | 2.086857  |     |   |   |           |           |           |
| 17                     | 1             | 0           | 10.889052                        | 0.647606  | 1.484598  | 100 | 6 | 0 | -5.282951 | -5.439973 | 2.314403  |     |   |   |           |           |           |
| 18                     | 1             | 0           | 6.894495                         | -0.494985 | -1.202101 | 101 | 6 | 0 | -1.343679 | -3.383251 | 0.512636  |     |   |   |           |           |           |
| 19                     | 1             | 0           | 13.691199                        | -3.627212 | -3.137156 | 102 | 6 | 0 | -2.549765 | -5.227589 | 1.566821  |     |   |   |           |           |           |
| 20                     | 1             | 0           | 11.685282                        | -4.199095 | -4.488294 | 103 | 6 | 0 | -3.727529 | -0.000594 | -2.248739 |     |   |   |           |           |           |
| 21                     | 1             | 0           | 9.435797                         | -3.630295 | -3.650895 | 104 | 6 | 0 | -1.805183 | -1.355730 | -0.582339 |     |   |   |           |           |           |
| 22                     | 16            | 0           | 6.185850                         | -2.953248 | -0.484339 | 105 | 6 | 0 | -6.461697 | -0.212888 | -0.502904 |     |   |   |           |           |           |
| 23                     | 6             | 0           | 6.258321                         | -5.455938 | -1.342470 | 106 | 6 | 0 | -7.564968 | -1.801305 | 1.0971384 |     |   |   |           |           |           |
| 24                     | 6             | 0           | 5.537888                         | -4.572418 | -0.655169 | 107 | 8 | 0 | -0.705731 | 3.181266  | 1.232575  |     |   |   |           |           |           |
| 25                     | 1             | 0           | 5.965862                         | -6.480374 | -1.535154 | 108 | 6 | 0 | -2.946404 | 4.010985  | 1.532796  |     |   |   |           |           |           |
| 26                     | 1             | 0           | 4.573495                         | -4.770968 | -0.205444 | 109 | 1 | 0 | -5.005300 | 4.561368  | 1.875554  |     |   |   |           |           |           |
| 27                     | 6             | 0           | 11.740912                        | -2.159346 | 1.415754  | 110 | 6 | 0 | -7.902944 | -3.210239 | 1.044743  |     |   |   |           |           |           |
| 28                     | 16            | 0           | 12.975838                        | -3.434805 | 1.481384  | 111 | 6 | 0 | -6.629657 | -5.125745 | 1.913208  |     |   |   |           |           |           |
| 29                     | 6             | 0           | 12.386926                        | -2.582730 | 3.917021  | 112 | 6 | 0 | -4.720237 | -6.361925 | 1.342315  |     |   |   |           |           |           |
| 30                     | 6             | 0           | 13.091317                        | -3.477631 | 3.227391  | 113 | 6 | 0 | -1.651953 | -4.739808 | 0.552837  |     |   |   |           |           |           |
| 31                     | 1             | 0           | 12.384461                        | -2.489234 | 4.995325  | 114 | 6 | 0 | -1.283405 | -2.696098 | -0.763777 |     |   |   |           |           |           |
| 32                     | 1             | 0           | 13.747869                        | -4.220365 | 3.662310  | 115 | 6 | 0 | -3.386820 | -6.259191 | 0.978273  |     |   |   |           |           |           |
| 33                     | 16            | 0           | 7.785528                         | -4.919668 | -2.010907 | 116 | 6 | 0 | -2.548822 | -0.754712 | -1.595371 |     |   |   |           |           |           |
| 34                     | 16            | 0           | 11.411714                        | -1.446441 | 3.009852  | 117 | 6 | 0 | -4.740744 | -0.246641 | -2.262500 |     |   |   |           |           |           |
| 35                     | 6             | 0           | 7.744810                         | -3.305142 | -1.266066 | 118 | 6 | 0 | -7.527986 | -1.142658 | -0.234288 |     |   |   |           |           |           |
| 36                     | 6             | 0           | 6.699265                         | 1.846735  | 0.049854  | 119 | 6 | 0 | -6.074505 | -0.352117 | -1.897003 |     |   |   |           |           |           |
| 37                     | 6             | 0           | 5.770649                         | 2.623836  | -0.005570 | 120 | 6 | 0 | -0.472072 | 2.313155  | 0.114714  |     |   |   |           |           |           |
| 38                     | 6             | 0           | 4.670904                         | 3.531431  | -0.051397 | 121 | 8 | 0 | -2.551449 | 5.092262  | 0.796315  |     |   |   |           |           |           |
| 39                     | 6             | 0           | 3.548731                         | 3.256420  | -0.849484 | 122 | 6 | 0 | -8.185150 | -3.902736 | -0.122787 |     |   |   |           |           |           |
| 40                     | 6             | 0           | 4.693833                         | 4.716235  | 0.701269  | 123 | 6 | 0 | -6.912854 | -5.845426 | 0.686582  |     |   |   |           |           |           |
| 41                     | 6             | 0           | 2.470566                         | 4.130478  | -0.873494 | 124 | 6 | 0 | -5.731810 | -6.611717 | 0.333283  |     |   |   |           |           |           |
| 42                     | 1             | 0           | 3.540737                         | 2.354682  | -1.452277 | 125 | 6 | 0 | -1.928033 | -5.458418 | -0.675923 |     |   |   |           |           |           |
| 43                     | 6             | 0           | 3.611685                         | 5.583927  | 0.671973  | 126 | 6 | 0 | -1.535621 | -3.385568 | -1.940562 |     |   |   |           |           |           |
| 44                     | 1             | 0           | 5.567458                         | 4.945535  | 1.301082  | 127 | 6 | 0 | -3.000824 | -6.400781 | -0.412707 |     |   |   |           |           |           |
| 45                     | 6             | 0           | 2.480493                         | 5.292894  | -0.096588 | 128 | 6 | 0 | -2.822232 | -1.479208 | -2.821786 |     |   |   |           |           |           |
| 46                     | 1             | 0           | 1.605811                         | 3.917523  | -1.496406 | 129 | 6 | 0 | -4.178753 | -1.164992 | -3.234428 |     |   |   |           |           |           |
| 47                     | 1             | 0           | 3.648121                         | 6.503624  | 1.251666  | 130 | 6 | 0 | -7.810505 | -1.868759 | -1.457222 |     |   |   |           |           |           |
| 48                     | 1             | 0           | -0.622044                        | 2.891980  | 5.571299  | 131 | 6 | 0 | -6.911783 | -1.378841 | -2.486863 |     |   |   |           |           |           |
| 49                     | 6             | 0           | -0.868179                        | 3.783258  | 5.003121  | 132 | 6 | 0 | -1.238545 | 2.768618  | -1.102916 |     |   |   |           |           |           |
| 50                     | 6             | 0           | 0.044252                         | 4.284344  | 4.079701  | 133 | 1 | 0 | 0.605509  | 2.342668  | -0.063640 |     |   |   |           |           |           |
| 51                     | 6             | 0           | -2.089152                        | 4.423814  | 5.193345  | 134 | 1 | 0 | -0.767044 | 1.287622  | 0.367956  |     |   |   |           |           |           |
| 52                     | 6             | 0           | -0.250626                        | 5.437387  | 3.353699  | 135 | 6 | 0 | -3.503891 | 6.134462  | 0.641841  |     |   |   |           |           |           |
| 53                     | 1             | 0           | 0.988213                         | 3.772345  | 3.915394  | 136 | 6 | 0 | -8.130407 | -3.218141 | -1.402910 |     |   |   |           |           |           |
| 54                     | 6             | 0           | -2.385970                        | 5.580372  | 4.473803  | 137 | 6 | 0 | -7.673386 | -5.248529 | -0.308830 |     |   |   |           |           |           |
| 55                     | 1             | 0           | -2.806790                        | 4.028304  | 5.905389  | 138 | 6 | 0 | -5.364628 | -6.746078 | -0.998683 |     |   |   |           |           |           |
| 56                     | 6             | 0           | 0.751567                         | 5.959608  | 2.359032  | 139 | 6 | 0 | -1.869711 | -4.798134 | -1.895600 |     |   |   |           |           |           |
| 57                     | 6             | 0           | -1.466078                        | 6.093675  | 3.564812  | 140 | 6 | 0 | -2.328495 | -2.766344 | -2.988949 |     |   |   |           |           |           |
| 58                     | 1             | 0           | -3.333933                        | 6.086084  | 4.628377  | 141 | 6 | 0 | -3.968142 | -6.636425 | -1.379844 |     |   |   |           |           |           |
| 59                     | 7             | 0           | 0.268829                         | 5.832793  | 0.946383  | 142 | 6 | 0 | -4.977995 | -2.152152 | -3.796357 |     |   |   |           |           |           |
| 60                     | 1             | 0           | 0.964750                         | 7.023170  | 2.513404  | 143 | 6 | 0 | -6.374089 | -2.260835 | -3.414963 |     |   |   |           |           |           |
| 61                     | 1             | 0           | 1.688222                         | 5.404217  | 2.429410  | 144 | 1 | 0 | -2.311833 | 2.834609  | -0.866662 |     |   |   |           |           |           |
| 62                     | 1             | 0           | -1.700251                        | 6.994943  | 3.002995  | 145 | 1 | 0 | -1.118366 | 2.022803  | -1.903133 |     |   |   |           |           |           |
| 63                     | 6             | 0           | 1.291119                         | 6.212338  | -0.089645 | 146 | 8 | 0 | -0.746014 | 4.030278  | -1.526925 |     |   |   |           |           |           |
| 64                     | 1             | 0           | -0.555974                        | 6.451809  | 0.830509  | 147 | 6 | 0 | -2.841423 | 7.274440  | -0.090078 |     |   |   |           |           |           |
| 65                     | 1             | 0           | -0.084464                        | 4.868938  | 0.791712  | 148 | 1 | 0 | -3.847789 | 6.471816  | 1.628906  |     |   |   |           |           |           |
| 66                     | 1             | 0           | 0.758368                         | 6.210876  | -1.044051 | 149 | 1 | 0 | -4.368450 | 5.778443  | 0.065770  |     |   |   |           |           |           |
| 67                     | 1             | 0           | 1.595304                         | 7.236948  | 0.145804  | 150 | 6 | 0 | -7.574294 | -4.136457 | -2.374961 |     |   |   |           |           |           |
| 68                     | 1             | 0           | -3.664679                        | 0.454090  | 6.210006  | 151 | 6 | 0 | -7.292808 | -5.391504 | -1.698672 |     |   |   |           |           |           |
| 69                     | 6             | 0           | -2.745872                        | 0.411177  | 5.599197  | 152 | 6 | 0 | -6.162274 | -6.122817 | -2.036832 |     |   |   |           |           |           |
| 70                     | 7             | 0           | -2.954509                        | -0.292897 | 4.345617  | 153 | 6 | 0 | -2.876460 | -5.047630 | -2.905464 |     |   |   |           |           |           |
| 71                     | 1             | 0           | -1.966761                        | -0.091904 | 6.177062  | 154 | 6 | 0 | -3.159487 | -3.792797 | -3.582141 |     |   |   |           |           |           |
| 72                     | 1             | 0           | -2.422224                        | 1.433611  | 5.387950  | 155 | 6 | 0 | -3.903936 | -5.946397 | -2.653843 |     |   |   |           |           |           |
| 73                     | 6             | 0           | -3.457133                        | -1.643016 | 4.537447  | 156 | 6 | 0 | -4.456614 | -3.493520 | -3.975948 |     |   |   |           |           |           |
| 74                     | 6             | 0           | -3.961194                        | 0.328611  | 3.505119  | 157 | 6 | 0 | -6.715063 | -3.669663 | -3.360192 |     |   |   |           |           |           |
| 75                     | 6             | 0           | -3.849650                        | -2.109749 | 3.112576  | 158 | 6 | 0 | -1.494746 | 4.511075  | -2.626586 |     |   |   |           |           |           |
| 76                     | 1             | 0           | -2.701696                        | -2.289838 | 4.991651  | 159 | 8 | 0 | -1.799917 | 7.781421  | 0.745916  |     |   |   |           |           |           |
| 77                     | 1             | 0           | -4.355332                        | -1.648426 | 5.182520  | 160 | 1 | 0 | -2.426386 | 6.954140  | -1.051012 |     |   |   |           |           |           |
| 78                     | 6             | 0           | -4.170634                        | -0.735236 | 2.368497  | 161 | 1 | 0 | -3.581162 | 8.060970  | -0.280218 |     |   |   |           |           |           |
| 79                     | 1             | 0           | -4.924759                        | 0.418029  | 4.046404  | 162 | 6 | 0 | -5.260202 | -5.628829 | -3.060506 |     |   |   |           |           |           |
| 80                     | 6             | 0           | -3.579189                        | 1.676742  | 2.958755  | 163 | 6 | 0 | -         |           |           |     |   |   |           |           |           |





| AT4: M06-2X/6-31G(d,p) |               |             |                                  | 84  | 6 | 0 | 5.581973  | 0.533584  | 0.624045  | 174   | 6 | 0 | -4.127435 | 3.676745 | 1.999881 |
|------------------------|---------------|-------------|----------------------------------|-----|---|---|-----------|-----------|-----------|-------|---|---|-----------|----------|----------|
| Standard orientation:  |               |             |                                  | 85  | 6 | 0 | 3.202360  | 3.393396  | -1.609491 | 175   | 1 | 0 | -4.142661 | 7.811270 | 2.048783 |
| Center Number          | Atomic Number | Atomic Type | Coordinates (Angstroms)<br>X Y Z | 86  | 6 | 0 | 4.367685  | 3.727797  | 0.470708  | 176   | 1 | 0 | -3.605320 | 7.007664 | 0.509094 |
|                        |               |             |                                  | 87  | 6 | 0 | 7.430178  | -0.965301 | -0.064088 | 177   | 8 | 0 | -3.352560 | 5.890943 | 2.271190 |
|                        |               |             |                                  | 88  | 6 | 0 | 6.951973  | -2.255355 | -2.059985 | 178   | 6 | 0 | -4.426357 | 5.045641 | 2.137548 |
|                        |               |             |                                  | 89  | 6 | 0 | 3.665619  | -1.079496 | -2.627880 | 179   | 6 | 0 | -5.163049 | 2.749165 | 1.965735 |
|                        |               |             |                                  | 90  | 6 | 0 | 5.751152  | -2.290571 | -0.872876 | 180   | 6 | 0 | -5.745445 | 5.468456 | 2.195498 |
|                        |               |             |                                  | 91  | 6 | 0 | 3.248092  | 0.467958  | 0.681864  | 181   | 6 | 0 | -6.488725 | 3.183856 | 2.035729 |
|                        |               |             |                                  | 92  | 6 | 0 | 2.946298  | -0.286266 | -1.602572 | 182   | 1 | 0 | -4.960900 | 1.686457 | 1.889703 |
|                        |               |             |                                  | 93  | 6 | 0 | 4.444294  | 0.508887  | 1.500862  | 183   | 6 | 0 | -6.782787 | 4.535677 | 2.134380 |
|                        |               |             |                                  | 94  | 6 | 0 | 6.708883  | -0.172461 | 0.960350  | 184   | 1 | 0 | -5.962432 | 6.526122 | 2.305045 |
|                        |               |             |                                  | 95  | 6 | 0 | 2.103459  | 4.050813  | -1.090964 | 185   | 1 | 0 | -7.284007 | 2.445492 | 2.009995 |
|                        |               |             |                                  | 96  | 1 | 0 | 3.171738  | 2.967971  | -2.609572 | 186   | 1 | 0 | -7.811767 | 4.873561 | 2.180192 |
|                        |               |             |                                  | 97  | 6 | 0 | 3.260462  | 4.393902  | 1.000143  | ----- |   |   |           |          |          |
|                        |               |             |                                  | 98  | 1 | 0 | 5.248101  | 3.580632  | 1.091173  |       |   |   |           |          |          |
|                        |               |             |                                  | 99  | 6 | 0 | 7.900898  | -2.171037 | 0.575492  |       |   |   |           |          |          |
|                        |               |             |                                  | 100 | 6 | 0 | 7.428211  | -3.422099 | -1.469685 |       |   |   |           |          |          |
|                        |               |             |                                  | 101 | 6 | 0 | 2.952718  | -2.323147 | -2.795882 |       |   |   |           |          |          |
|                        |               |             |                                  | 102 | 6 | 0 | 5.078767  | -3.493351 | -3.066270 |       |   |   |           |          |          |
|                        |               |             |                                  | 103 | 6 | 0 | 2.135750  | -0.253790 | 1.110985  |       |   |   |           |          |          |
|                        |               |             |                                  | 104 | 6 | 0 | 1.809196  | -1.066708 | -1.171023 |       |   |   |           |          |          |
|                        |               |             |                                  | 105 | 6 | 0 | 4.482185  | -0.179681 | 2.710301  |       |   |   |           |          |          |
|                        |               |             |                                  | 106 | 6 | 0 | 6.757519  | -0.912777 | 2.198526  |       |   |   |           |          |          |
|                        |               |             |                                  | 107 | 8 | 0 | 0.939019  | 4.212525  | -1.817425 |       |   |   |           |          |          |
|                        |               |             |                                  | 108 | 6 | 0 | 2.115646  | 4.541028  | 0.226367  |       |   |   |           |          |          |
|                        |               |             |                                  | 109 | 1 | 0 | 3.301835  | 4.790507  | 2.007596  |       |   |   |           |          |          |
|                        |               |             |                                  | 110 | 6 | 0 | 7.491356  | -2.142157 | 1.966750  |       |   |   |           |          |          |
|                        |               |             |                                  | 111 | 6 | 0 | 7.916007  | -3.378960 | -0.115416 |       |   |   |           |          |          |
|                        |               |             |                                  | 112 | 6 | 0 | 6.712995  | -4.673134 | -1.656647 |       |   |   |           |          |          |
|                        |               |             |                                  | 113 | 6 | 0 | 3.640241  | -3.510858 | -3.026613 |       |   |   |           |          |          |
|                        |               |             |                                  | 114 | 6 | 0 | 1.807099  | -2.317149 | -1.905558 |       |   |   |           |          |          |
|                        |               |             |                                  | 115 | 6 | 0 | 5.568370  | -4.708594 | -2.437374 |       |   |   |           |          |          |
|                        |               |             |                                  | 116 | 6 | 0 | 1.395439  | -1.042916 | 0.159077  |       |   |   |           |          |          |
|                        |               |             |                                  | 117 | 6 | 0 | 2.180567  | -0.982848 | 2.367372  |       |   |   |           |          |          |
|                        |               |             |                                  | 118 | 6 | 0 | 5.670716  | -0.909057 | 3.068894  |       |   |   |           |          |          |
|                        |               |             |                                  | 119 | 6 | 0 | 3.326722  | -0.947161 | 3.146736  |       |   |   |           |          |          |
|                        |               |             |                                  | 120 | 6 | 0 | 0.227645  | 2.989192  | -2.108948 |       |   |   |           |          |          |
|                        |               |             |                                  | 121 | 8 | 0 | 0.961398  | 5.132461  | 0.633846  |       |   |   |           |          |          |
|                        |               |             |                                  | 122 | 6 | 0 | 7.110756  | -3.311438 | 2.606674  |       |   |   |           |          |          |
|                        |               |             |                                  | 123 | 6 | 0 | 7.506797  | -4.601626 | 0.549246  |       |   |   |           |          |          |
|                        |               |             |                                  | 124 | 6 | 0 | 6.762483  | -5.403649 | -0.405358 |       |   |   |           |          |          |
|                        |               |             |                                  | 125 | 6 | 0 | 3.223016  | -4.732400 | -2.366021 |       |   |   |           |          |          |
|                        |               |             |                                  | 126 | 6 | 0 | 1.399385  | -3.487990 | -1.283288 |       |   |   |           |          |          |
|                        |               |             |                                  | 127 | 6 | 0 | 4.416417  | -5.476253 | -2.560900 |       |   |   |           |          |          |
|                        |               |             |                                  | 128 | 6 | 0 | 0.979743  | -2.268112 | 0.813695  |       |   |   |           |          |          |
|                        |               |             |                                  | 129 | 6 | 0 | 1.464309  | -2.230909 | 2.182168  |       |   |   |           |          |          |
|                        |               |             |                                  | 130 | 6 | 0 | 5.263904  | -2.134164 | 3.729862  |       |   |   |           |          |          |
|                        |               |             |                                  | 131 | 6 | 0 | 3.813092  | -2.158367 | 3.778675  |       |   |   |           |          |          |
|                        |               |             |                                  | 132 | 6 | 0 | 0.025323  | 2.087363  | -0.910952 |       |   |   |           |          |          |
|                        |               |             |                                  | 133 | 1 | 0 | -0.737446 | 3.310351  | -2.521080 |       |   |   |           |          |          |
|                        |               |             |                                  | 134 | 1 | 0 | 0.778924  | 2.431638  | -2.875799 |       |   |   |           |          |          |
|                        |               |             |                                  | 135 | 6 | 0 | 0.839445  | 5.488321  | 2.000111  |       |   |   |           |          |          |
|                        |               |             |                                  | 136 | 6 | 0 | 5.966265  | -3.308766 | 3.502217  |       |   |   |           |          |          |
|                        |               |             |                                  | 137 | 6 | 0 | 7.112654  | -4.568550 | 1.879556  |       |   |   |           |          |          |
|                        |               |             |                                  | 138 | 6 | 0 | 5.660267  | -6.137187 | 0.013007  |       |   |   |           |          |          |
|                        |               |             |                                  | 139 | 6 | 0 | 2.126177  | -4.724007 | -1.514997 |       |   |   |           |          |          |
|                        |               |             |                                  | 140 | 6 | 0 | 0.984224  | -3.464278 | 0.108276  |       |   |   |           |          |          |
|                        |               |             |                                  | 141 | 6 | 0 | 4.460495  | -6.173837 | -0.804107 |       |   |   |           |          |          |
|                        |               |             |                                  | 142 | 6 | 0 | 1.933042  | -3.392899 | 2.782070  |       |   |   |           |          |          |
|                        |               |             |                                  | 143 | 6 | 0 | 3.132001  | -3.355512 | 3.599273  |       |   |   |           |          |          |
|                        |               |             |                                  | 144 | 1 | 0 | 0.994260  | 1.848537  | -0.445546 |       |   |   |           |          |          |
|                        |               |             |                                  | 145 | 1 | 0 | -0.400493 | 1.140498  | -1.277428 |       |   |   |           |          |          |
|                        |               |             |                                  | 146 | 8 | 0 | -0.848133 | 2.694891  | 0.013814  |       |   |   |           |          |          |
|                        |               |             |                                  | 147 | 6 | 0 | -0.609377 | 5.843409  | 2.202154  |       |   |   |           |          |          |
|                        |               |             |                                  | 148 | 1 | 0 | 1.512361  | 6.321391  | 2.242000  |       |   |   |           |          |          |
|                        |               |             |                                  | 149 | 1 | 0 | 1.088618  | 4.627982  | 2.636119  |       |   |   |           |          |          |
|                        |               |             |                                  | 150 | 6 | 0 | 5.257502  | -4.558138 | 3.319987  |       |   |   |           |          |          |
|                        |               |             |                                  | 151 | 6 | 0 | 5.965742  | -5.336388 | 2.316850  |       |   |   |           |          |          |
|                        |               |             |                                  | 152 | 6 | 0 | 5.253953  | -6.103561 | 1.404514  |       |   |   |           |          |          |
|                        |               |             |                                  | 153 | 6 | 0 | 2.171291  | -5.455775 | -0.266518 |       |   |   |           |          |          |
|                        |               |             |                                  | 154 | 6 | 0 | 1.465515  | -4.676349 | 0.737441  |       |   |   |           |          |          |
|                        |               |             |                                  | 155 | 6 | 0 | 3.313445  | -6.163761 | 0.083163  |       |   |   |           |          |          |
|                        |               |             |                                  | 156 | 6 | 0 | 1.931505  | -4.642318 | 2.044694  |       |   |   |           |          |          |
|                        |               |             |                                  | 157 | 6 | 0 | 3.870442  | -4.582952 | 3.366972  |       |   |   |           |          |          |
|                        |               |             |                                  | 158 | 6 | 0 | -1.008470 | 1.953563  | 1.204779  |       |   |   |           |          |          |
|                        |               |             |                                  | 159 | 8 | 0 | -0.932702 | 6.969835  | 1.368556  |       |   |   |           |          |          |
|                        |               |             |                                  | 160 | 1 | 0 | -1.229224 | 4.985696  | 1.935713  |       |   |   |           |          |          |
|                        |               |             |                                  | 161 | 1 | 0 | -0.797201 | 6.099288  | 3.251380  |       |   |   |           |          |          |
|                        |               |             |                                  | 162 | 6 | 0 | 3.803319  | -6.121089 | 1.449247  |       |   |   |           |          |          |
|                        |               |             |                                  | 163 | 6 | 0 | 3.127599  | -5.379508 | 2.057491  |       |   |   |           |          |          |
|                        |               |             |                                  | 164 | 1 | 0 | -0.739583 | 0.897279  | 1.4054079 |       |   |   |           |          |          |
|                        |               |             |                                  | 165 | 1 | 0 | -0.358191 | 2.359022  | 1.995631  |       |   |   |           |          |          |
|                        |               |             |                                  | 166 | 6 | 0 | -2.467834 | 2.009567  | 1.609755  |       |   |   |           |          |          |
|                        |               |             |                                  | 167 | 6 | 0 | -2.011793 | 7.771659  | 1.832784  |       |   |   |           |          |          |
|                        |               |             |                                  | 168 | 1 | 0 | -2.657866 | 1.398281  | 2.502998  |       |   |   |           |          |          |
|                        |               |             |                                  | 169 | 1 | 0 | -3.069908 | 1.612151  | 0.778699  |       |   |   |           |          |          |
|                        |               |             |                                  | 170 | 8 | 0 | -2.803802 | 3.363955  | 1.856340  |       |   |   |           |          |          |
|                        |               |             |                                  | 171 | 1 | 0 | -1.871573 | 7.975820  | 2.902281  |       |   |   |           |          |          |
|                        |               |             |                                  | 172 | 1 | 0 | -1.952949 | 8.719684  | 1.288836  |       |   |   |           |          |          |
|                        |               |             |                                  | 173 | 6 | 0 | -3.382877 | 7.144185  | 1.618939  |       |   |   |           |          |          |



| AT5: M06-2X/6-31G(d,p) |        |        |                         | 84  | 6 | 0 | 5.878942  | 1.005233  | 1.035012  | 174 | 6 | 0 | -5.017988 | 3.441254 | 1.260173 |
|------------------------|--------|--------|-------------------------|-----|---|---|-----------|-----------|-----------|-----|---|---|-----------|----------|----------|
| Standard orientation:  |        |        |                         | 85  | 6 | 0 | 3.219689  | 3.426543  | -1.225193 | 175 | 1 | 0 | -4.761150 | 7.518085 | 1.948482 |
|                        |        |        |                         | 86  | 6 | 0 | 4.085164  | 4.060309  | 0.928834  | 176 | 1 | 0 | -4.175631 | 7.031706 | 0.339281 |
|                        |        |        |                         | 87  | 6 | 0 | 8.086326  | 0.001735  | 0.531533  | 177 | 8 | 0 | -4.115659 | 5.541964 | 1.763981 |
| Center                 | Atomic | Atomic | Coordinates (Angstroms) | 88  | 6 | 0 | 8.194490  | -1.099840 | -1.624206 | 178 | 6 | 0 | -5.216336 | 4.833131 | 1.376178 |
| Number                 | Number | Type   | X Y Z                   | 89  | 6 | 0 | 4.851699  | -0.545102 | -2.625729 | 179 | 6 | 0 | -6.095173 | 2.622278 | 0.946012 |
|                        |        |        |                         | 90  | 6 | 0 | 7.161084  | -1.274082 | -2.626506 | 180 | 6 | 0 | -6.453946 | 5.390398 | 1.100897 |
|                        |        |        |                         | 91  | 6 | 0 | 3.631361  | 0.467862  | 0.693216  | 181 | 6 | 0 | -7.350309 | 3.188965 | 0.693885 |
|                        |        |        |                         | 92  | 6 | 0 | 3.840663  | -0.047155 | -1.665809 | 182 | 1 | 0 | -5.966788 | 1.548748 | 0.855213 |
|                        |        |        |                         | 93  | 6 | 0 | 4.658734  | 0.644733  | 1.701478  | 183 | 6 | 0 | -7.527106 | 4.561904 | 0.751535 |
|                        |        |        |                         | 94  | 6 | 0 | 7.070265  | 0.501061  | 1.488442  | 184 | 1 | 0 | -6.595920 | 6.463572 | 1.170542 |
|                        |        |        |                         | 95  | 6 | 0 | 1.958952  | 3.815172  | -0.820513 | 185 | 1 | 0 | -8.184558 | 2.539305 | 0.451273 |
|                        |        |        |                         | 96  | 1 | 0 | 3.366803  | 2.982544  | -2.206014 | 186 | 1 | 0 | -8.496615 | 5.001043 | 0.544879 |
|                        |        |        |                         | 97  | 6 | 0 | 2.817810  | 4.488484  | 1.332124  |     |   |   |           |          |          |
|                        |        |        |                         | 98  | 1 | 0 | 4.914972  | 4.126297  | 1.627576  |     |   |   |           |          |          |
|                        |        |        |                         | 99  | 6 | 0 | 8.708429  | -1.155898 | 1.128878  |     |   |   |           |          |          |
|                        |        |        |                         | 100 | 6 | 0 | 8.818726  | -2.213018 | -1.070505 |     |   |   |           |          |          |
|                        |        |        |                         | 101 | 6 | 0 | 4.453112  | -1.872973 | -3.024855 |     |   |   |           |          |          |
|                        |        |        |                         | 102 | 6 | 0 | 6.799026  | -2.552798 | -3.039823 |     |   |   |           |          |          |
|                        |        |        |                         | 103 | 6 | 0 | 2.649965  | -0.505506 | 0.861437  |     |   |   |           |          |          |
|                        |        |        |                         | 104 | 6 | 0 | 2.842951  | -1.079474 | -1.507332 |     |   |   |           |          |          |
|                        |        |        |                         | 105 | 6 | 0 | 4.669191  | -0.166069 | 2.832313  |     |   |   |           |          |          |
|                        |        |        |                         | 106 | 6 | 0 | 7.097734  | -0.362110 | 2.645337  |     |   |   |           |          |          |
|                        |        |        |                         | 107 | 8 | 0 | 0.847510  | 3.599186  | -1.618964 |     |   |   |           |          |          |
|                        |        |        |                         | 108 | 6 | 0 | 1.750925  | 4.368000  | 0.452756  |     |   |   |           |          |          |
|                        |        |        |                         | 109 | 1 | 0 | 2.674559  | 4.909647  | 2.320465  |     |   |   |           |          |          |
|                        |        |        |                         | 110 | 6 | 0 | 8.105736  | -1.381349 | 2.428933  |     |   |   |           |          |          |
|                        |        |        |                         | 111 | 6 | 0 | 9.084725  | -2.241536 | 0.343953  |     |   |   |           |          |          |
|                        |        |        |                         | 112 | 6 | 0 | 8.427002  | -3.548191 | -1.488587 |     |   |   |           |          |          |
|                        |        |        |                         | 113 | 6 | 0 | 5.407971  | -2.861456 | -3.244425 |     |   |   |           |          |          |
|                        |        |        |                         | 114 | 6 | 0 | 3.216860  | -2.204799 | -2.342337 |     |   |   |           |          |          |
|                        |        |        |                         | 115 | 6 | 0 | 7.441925  | -3.713905 | -2.449500 |     |   |   |           |          |          |
|                        |        |        |                         | 116 | 6 | 0 | 2.243164  | -1.301151 | -0.269730 |     |   |   |           |          |          |
|                        |        |        |                         | 117 | 6 | 0 | 2.669723  | -1.360452 | 2.036851  |     |   |   |           |          |          |
|                        |        |        |                         | 118 | 6 | 0 | 5.922353  | -0.681406 | 3.319490  |     |   |   |           |          |          |
|                        |        |        |                         | 119 | 6 | 0 | 3.656878  | -1.195428 | 2.997008  |     |   |   |           |          |          |
|                        |        |        |                         | 120 | 6 | 0 | 0.459921  | 2.208870  | -1.598048 |     |   |   |           |          |          |
|                        |        |        |                         | 121 | 8 | 0 | 0.467828  | 4.738822  | 0.700768  |     |   |   |           |          |          |
|                        |        |        |                         | 122 | 6 | 0 | 7.899052  | -2.673236 | 2.887312  |     |   |   |           |          |          |
|                        |        |        |                         | 123 | 6 | 0 | 8.856799  | -3.593442 | 0.817166  |     |   |   |           |          |          |
|                        |        |        |                         | 124 | 6 | 0 | 8.451327  | -4.403008 | -0.317562 |     |   |   |           |          |          |
|                        |        |        |                         | 125 | 6 | 0 | 5.173453  | -4.214283 | -2.777162 |     |   |   |           |          |          |
|                        |        |        |                         | 126 | 6 | 0 | 2.986689  | -3.500641 | -1.905524 |     |   |   |           |          |          |
|                        |        |        |                         | 127 | 6 | 0 | 6.433424  | -4.742801 | -2.286143 |     |   |   |           |          |          |
|                        |        |        |                         | 128 | 6 | 0 | 2.012421  | -2.656286 | 0.193022  |     |   |   |           |          |          |
|                        |        |        |                         | 129 | 6 | 0 | 2.276308  | -2.692637 | 1.620449  |     |   |   |           |          |          |
|                        |        |        |                         | 130 | 6 | 0 | 5.699176  | -2.035797 | 3.788162  |     |   |   |           |          |          |
|                        |        |        |                         | 131 | 6 | 0 | 4.296270  | -2.353621 | 3.589893  |     |   |   |           |          |          |
|                        |        |        |                         | 132 | 6 | 0 | -0.053755 | 1.705453  | -0.264995 |     |   |   |           |          |          |
|                        |        |        |                         | 133 | 1 | 0 | -0.318676 | 2.096430  | -2.352396 |     |   |   |           |          |          |
|                        |        |        |                         | 134 | 1 | 0 | 1.330191  | 1.605893  | -1.884821 |     |   |   |           |          |          |
|                        |        |        |                         | 135 | 6 | 0 | 0.079964  | 5.004363  | 2.037149  |     |   |   |           |          |          |
|                        |        |        |                         | 136 | 6 | 0 | 6.664894  | -3.009741 | 3.575508  |     |   |   |           |          |          |
|                        |        |        |                         | 137 | 6 | 0 | 8.277291  | -3.805384 | 2.060219  |     |   |   |           |          |          |
|                        |        |        |                         | 138 | 6 | 0 | 7.484903  | -5.387363 | -0.158032 |     |   |   |           |          |          |
|                        |        |        |                         | 139 | 6 | 0 | 3.989849  | -4.527840 | -2.123119 |     |   |   |           |          |          |
|                        |        |        |                         | 140 | 6 | 0 | 2.378675  | -3.731057 | -0.606447 |     |   |   |           |          |          |
|                        |        |        |                         | 141 | 6 | 0 | 6.453048  | -5.560424 | -1.164445 |     |   |   |           |          |          |
|                        |        |        |                         | 142 | 6 | 0 | 2.891958  | -3.803282 | 2.183052  |     |   |   |           |          |          |
|                        |        |        |                         | 143 | 6 | 0 | 3.923819  | -3.629947 | 3.188876  |     |   |   |           |          |          |
|                        |        |        |                         | 144 | 1 | 0 | 0.634012  | 1.983548  | 0.550295  |     |   |   |           |          |          |
|                        |        |        |                         | 145 | 1 | 0 | -0.044479 | 0.604674  | -0.323717 |     |   |   |           |          |          |
|                        |        |        |                         | 146 | 8 | 0 | -1.363014 | 2.166908  | -0.019122 |     |   |   |           |          |          |
|                        |        |        |                         | 147 | 6 | 0 | -1.402208 | 5.272198  | 1.983992  |     |   |   |           |          |          |
|                        |        |        |                         | 148 | 1 | 0 | 0.622979  | 5.874100  | 2.430189  |     |   |   |           |          |          |
|                        |        |        |                         | 149 | 1 | 0 | 0.290830  | 4.130172  | 2.668369  |     |   |   |           |          |          |
|                        |        |        |                         | 150 | 6 | 0 | 6.275284  | -4.342194 | 3.163640  |     |   |   |           |          |          |
|                        |        |        |                         | 151 | 6 | 0 | 7.272378  | -4.834038 | 2.227476  |     |   |   |           |          |          |
|                        |        |        |                         | 152 | 6 | 0 | 6.883142  | -5.608000 | 1.142758  |     |   |   |           |          |          |
|                        |        |        |                         | 153 | 6 | 0 | 4.010008  | -5.383515 | -0.955193 |     |   |   |           |          |          |
|                        |        |        |                         | 154 | 6 | 0 | 3.014125  | -4.891183 | -0.017913 |     |   |   |           |          |          |
|                        |        |        |                         | 155 | 6 | 0 | 5.214614  | -5.888224 | -0.484895 |     |   |   |           |          |          |
|                        |        |        |                         | 156 | 6 | 0 | 3.266484  | -4.927460 | 1.346714  |     |   |   |           |          |          |
|                        |        |        |                         | 157 | 6 | 0 | 4.934612  | -4.646997 | 2.973840  |     |   |   |           |          |          |
|                        |        |        |                         | 158 | 6 | 0 | -1.935993 | 1.512126  | 1.094957  |     |   |   |           |          |          |
|                        |        |        |                         | 159 | 8 | 0 | -1.610885 | 6.510202  | 1.282221  |     |   |   |           |          |          |
|                        |        |        |                         | 160 | 1 | 0 | -1.919596 | 4.462095  | 1.462330  |     |   |   |           |          |          |
|                        |        |        |                         | 161 | 1 | 0 | -1.811035 | 5.346531  | 2.996421  |     |   |   |           |          |          |
|                        |        |        |                         | 162 | 6 | 0 | 5.479849  | -5.918835 | 0.941330  |     |   |   |           |          |          |
|                        |        |        |                         | 163 | 6 | 0 | 4.528508  | -5.450622 | 1.835840  |     |   |   |           |          |          |
|                        |        |        |                         | 164 | 1 | 0 | -1.717930 | 0.434184  | 1.052622  |     |   |   |           |          |          |
|                        |        |        |                         | 165 | 1 | 0 | -1.516641 | 1.902490  | 2.036139  |     |   |   |           |          |          |
|                        |        |        |                         | 166 | 6 | 0 | -3.436336 | 1.682723  | 1.087706  |     |   |   |           |          |          |
|                        |        |        |                         | 167 | 6 | 0 | -2.625410 | 7.343630  | 1.821677  |     |   |   |           |          |          |
|                        |        |        |                         | 168 | 1 | 0 | -3.883835 | 0.990003  | 1.813473  |     |   |   |           |          |          |
|                        |        |        |                         | 169 | 1 | 0 | -3.828759 | 1.450920  | 0.089479  |     |   |   |           |          |          |
|                        |        |        |                         | 170 | 8 | 0 | -3.736966 | 3.021422  | 1.440679  |     |   |   |           |          |          |
|                        |        |        |                         | 171 | 1 | 0 | -2.541033 | 7.354029  | 2.915450  |     |   |   |           |          |          |
|                        |        |        |                         | 172 | 1 | 0 | -2.440274 | 8.357891  | 1.453993  |     |   |   |           |          |          |
|                        |        |        |                         | 173 | 6 | 0 | -4.021015 | 6.901761  | 1.418946  |     |   |   |           |          |          |





**BT2: M06-2X/6-31G(d,p)**

| Standard orientation: |        |        |                         |           |           |     | 84  | 6 | 0         | -5.981151 | -0.719408 | -2.995983 | 174 | 6 | 0         | 0.268614  | 9.148857  | -4.006044 |
|-----------------------|--------|--------|-------------------------|-----------|-----------|-----|-----|---|-----------|-----------|-----------|-----------|-----|---|-----------|-----------|-----------|-----------|
| Standard orientation: |        |        |                         |           |           |     | 85  | 6 | 0         | -6.985228 | 0.105693  | -1.051501 | 175 | 1 | 0         | -1.328492 | 7.730522  | -4.372903 |
| Standard orientation: |        |        |                         |           |           |     | 86  | 6 | 0         | -5.480394 | -0.023892 | 2.341766  | 176 | 6 | 0         | 1.161367  | 9.628121  | -3.056478 |
| Standard orientation: |        |        |                         |           |           |     | 87  | 6 | 0         | -6.822395 | 0.211810  | 3.026514  | 177 | 1 | 0         | 1.881462  | 9.502091  | -1.043754 |
| Center                | Atomic | Atomic | Coordinates (Angstroms) |           |           | 88  | 6   | 0 | -4.218780 | -2.199827 | 3.081036  | 178       | 1   | 0 | 0.271755  | 9.545546  | -0.014694 |           |
| Number                | Number | Type   | X                       | Y         | Z         | 89  | 6   | 0 | -3.639305 | 0.133634  | 4.054985  | 179       | 1   | 0 | 1.868314  | 10.408253 | -3.316813 |           |
| 1                     | 6      | 0      | 7.275680                | -1.647219 | -1.994161 | 90  | 6   | 0 | -3.701356 | -4.712661 | -2.881713 | 180       | 1   | 0 | 0.098739  | 4.472349  | 0.532607  |           |
| 2                     | 6      | 0      | 8.325598                | -2.547360 | -1.885597 | 91  | 6   | 0 | -3.544915 | -5.925025 | -0.876568 | 181       | 7   | 0 | -0.359032 | 4.419308  | -0.394128 |           |
| 3                     | 6      | 0      | 9.257765                | -2.449055 | -0.848481 | 92  | 6   | 0 | -3.395697 | -5.806360 | 0.498561  | 182       | 6   | 0 | 0.650266  | 4.671454  | -1.480492 |           |
| 4                     | 6      | 0      | 9.106254                | -1.428256 | 0.119468  | 93  | 6   | 0 | -3.157808 | -4.265917 | 2.251275  | 183       | 1   | 0 | -0.272334 | 2.325674  | -0.471884 |           |
| 5                     | 6      | 0      | 8.035008                | -0.545635 | 0.020704  | 94  | 6   | 0 | -6.156010 | -3.485832 | -3.615734 | 184       | 1   | 0 | -1.654359 | 2.992286  | 0.413634  |           |
| 6                     | 6      | 0      | 7.121674                | -0.635275 | -1.038975 | 95  | 6   | 0 | -7.233985 | -1.429041 | -2.806127 | 185       | 1   | 0 | 0.108012  | 4.614804  | -2.426460 |           |
| 7                     | 6      | 0      | 10.381519               | -3.390566 | -0.675863 | 96  | 6   | 0 | -7.858304 | -0.917096 | -1.600974 | 186       | 1   | 0 | 0.984012  | 5.697855  | -1.329134 |           |
| 8                     | 6      | 0      | 10.090359               | -1.383258 | 1.222879  | 97  | 6   | 0 | -6.685801 | -0.966177 | 2.343116  |           |     |   |           |           |           |           |
| 9                     | 6      | 0      | 10.505077               | -2.720471 | 1.702923  | 98  | 6   | 0 | -5.614765 | 1.166084  | 3.350269  |           |     |   |           |           |           |           |
| 10                    | 6      | 0      | 10.655430               | -3.739227 | 0.736652  | 99  | 6   | 0 | -7.534375 | -0.684142 | 1.216716  |           |     |   |           |           |           |           |
| 11                    | 6      | 0      | 11.003837               | -5.026065 | 1.151378  | 100 | 6   | 0 | -5.402054 | -2.869732 | 3.254488  |           |     |   |           |           |           |           |
| 12                    | 1      | 0      | 11.063579               | -5.827422 | 0.421626  | 101 | 7   | 0 | -4.800884 | 0.877717  | 4.517877  |           |     |   |           |           |           |           |
| 13                    | 6      | 0      | 11.233645               | -5.304694 | 2.495489  | 102 | 6   | 0 | -2.442103 | 1.001724  | 3.716973  |           |     |   |           |           |           |           |
| 14                    | 6      | 0      | 11.086269               | -4.301328 | 3.446416  | 103 | 1   | 0 | -3.333252 | -0.576025 | 4.829849  |           |     |   |           |           |           |           |
| 15                    | 6      | 0      | 10.708713               | -3.021467 | 3.050780  | 104 | 6   | 0 | -4.953703 | -5.419262 | -2.685488 |           |     |   |           |           |           |           |
| 16                    | 1      | 0      | 6.556703                | -1.735668 | -2.801061 | 105 | 6   | 0 | -4.856775 | -6.166991 | -1.444998 |           |     |   |           |           |           |           |
| 17                    | 1      | 0      | 8.400573                | -3.361566 | -2.598864 | 106 | 6   | 0 | -4.553851 | -5.921456 | 1.366550  |           |     |   |           |           |           |           |
| 18                    | 1      | 0      | 7.875497                | 0.206646  | 0.786121  | 107 | 6   | 0 | -4.398548 | -4.968966 | 2.448900  |           |     |   |           |           |           |           |
| 19                    | 1      | 0      | 11.504273               | -6.310801 | 2.797902  | 108 | 6   | 0 | -6.152194 | -4.819591 | -3.043537 |           |     |   |           |           |           |           |
| 20                    | 1      | 0      | 11.241612               | -4.516383 | 4.498370  | 109 | 6   | 0 | -7.317418 | -2.782089 | -3.106505 |           |     |   |           |           |           |           |
| 21                    | 1      | 0      | 10.538543               | -2.257808 | 3.803237  | 110 | 6   | 0 | -8.537469 | -1.775882 | -0.750823 |           |     |   |           |           |           |           |
| 22                    | 16     | 0      | 10.253721               | 1.376954  | 1.013691  | 111 | 6   | 0 | -6.680991 | -2.230653 | 2.871770  |           |     |   |           |           |           |           |
| 23                    | 6      | 0      | 12.331631               | 1.512304  | 2.647439  | 112 | 1   | 0 | -5.253571 | 2.067215  | 2.844147  |           |     |   |           |           |           |           |
| 24                    | 6      | 0      | 11.581342               | 2.209645  | 1.797172  | 113 | 1   | 0 | -6.655120 | 1.341943  | 3.634213  |           |     |   |           |           |           |           |
| 25                    | 1      | 0      | 13.170010               | 1.910587  | 3.204699  | 114 | 6   | 0 | -8.381342 | -1.653566 | 0.688955  |           |     |   |           |           |           |           |
| 26                    | 1      | 0      | 11.720370               | 3.256801  | 1.561092  | 115 | 6   | 0 | -5.502725 | -4.272914 | 2.929119  |           |     |   |           |           |           |           |
| 27                    | 6      | 0      | 11.156596               | -3.812461 | -1.708214 | 116 | 6   | 0 | -5.540270 | 0.174424  | 5.568437  |           |     |   |           |           |           |           |
| 28                    | 16     | 0      | 12.594251               | -4.835284 | -1.499620 | 117 | 6   | 0 | -1.184412 | 0.411850  | 3.601700  |           |     |   |           |           |           |           |
| 29                    | 6      | 0      | 12.436599               | -3.947944 | -3.987630 | 118 | 6   | 0 | -2.601235 | 2.347375  | 3.388849  |           |     |   |           |           |           |           |
| 30                    | 6      | 0      | 13.189333               | -4.637868 | -3.133404 | 119 | 6   | 0 | -5.963376 | -6.276725 | -0.614674 |           |     |   |           |           |           |           |
| 31                    | 1      | 0      | 12.679353               | -3.767295 | -5.026917 | 120 | 6   | 0 | -5.808798 | -6.149312 | 0.819594  |           |     |   |           |           |           |           |
| 32                    | 1      | 0      | 14.136567               | -5.102951 | -3.375139 | 121 | 6   | 0 | -7.312132 | -4.939147 | -2.179976 |           |     |   |           |           |           |           |
| 33                    | 16     | 0      | 11.923526               | -0.170598 | 2.905174  | 122 | 6   | 0 | -8.032213 | -3.680830 | -2.217994 |           |     |   |           |           |           |           |
| 34                    | 16     | 0      | 10.920068               | -3.303624 | -3.394158 | 123 | 6   | 0 | -8.631590 | -3.188363 | -1.066904 |           |     |   |           |           |           |           |
| 35                    | 6      | 0      | 10.642530               | -0.229836 | 1.672699  | 124 | 6   | 0 | -7.533696 | -3.257795 | 2.321963  |           |     |   |           |           |           |           |
| 36                    | 6      | 0      | 6.025618                | 0.278071  | -1.122423 | 125 | 6   | 0 | -8.383566 | -2.976503 | 1.257409  |           |     |   |           |           |           |           |
| 37                    | 6      | 0      | 5.093783                | 1.049840  | -1.193476 | 126 | 6   | 0 | -6.813563 | -4.515903 | 2.358287  |           |     |   |           |           |           |           |
| 38                    | 6      | 0      | 3.991822                | 1.953483  | -1.275634 | 127 | 1   | 0 | -4.888540 | 0.036843  | 6.433887  |           |     |   |           |           |           |           |
| 39                    | 6      | 0      | 3.825248                | 2.965386  | -0.315142 | 128 | 1   | 0 | -5.920602 | -0.809308 | 5.255793  |           |     |   |           |           |           |           |
| 40                    | 6      | 0      | 3.066388                | 1.855947  | -2.324497 | 129 | 1   | 0 | -6.386807 | 0.789738  | 5.879901  |           |     |   |           |           |           |           |
| 41                    | 6      | 0      | 2.750106                | 3.836683  | -0.395107 | 130 | 6   | 0 | -0.118938 | 1.133773  | 3.075769  |           |     |   |           |           |           |           |
| 42                    | 1      | 0      | 4.559890                | 3.062652  | 0.477684  | 131 | 1   | 0 | -1.045937 | -0.630760 | 3.873378  |           |     |   |           |           |           |           |
| 43                    | 6      | 0      | 1.990261                | 2.731777  | -2.393773 | 132 | 6   | 0 | -1.541887 | 3.072285  | 2.847430  |           |     |   |           |           |           |           |
| 44                    | 1      | 0      | 3.205206                | 1.093280  | -3.082541 | 133 | 1   | 0 | -3.560335 | 2.809898  | 3.574867  |           |     |   |           |           |           |           |
| 45                    | 6      | 0      | 1.809242                | 3.716472  | -1.421743 | 134 | 6   | 0 | -7.218891 | -5.648317 | -0.990404 |           |     |   |           |           |           |           |
| 46                    | 1      | 0      | 2.636262                | 4.633791  | 0.336488  | 135 | 6   | 0 | -6.965575 | -5.434950 | 1.331068  |           |     |   |           |           |           |           |
| 47                    | 1      | 0      | 1.294160                | 2.663741  | -3.224691 | 136 | 6   | 0 | -8.533859 | -3.931349 | 0.176733  |           |     |   |           |           |           |           |
| 48                    | 1      | 0      | -2.102282               | 1.501571  | -4.765985 | 137 | 6   | 0 | -0.300896 | 2.446525  | 2.667240  |           |     |   |           |           |           |           |
| 49                    | 6      | 0      | -2.398895               | 2.110853  | -3.918662 | 138 | 1   | 0 | 0.856121  | 0.678506  | 2.932985  |           |     |   |           |           |           |           |
| 50                    | 6      | 0      | -1.555782               | 2.218264  | -2.814092 | 139 | 8   | 0 | -1.645208 | 4.366666  | 2.403357  |           |     |   |           |           |           |           |
| 51                    | 6      | 0      | -3.630648               | 2.757393  | -3.920738 | 140 | 6   | 0 | -7.839955 | -5.132522 | 0.211793  |           |     |   |           |           |           |           |
| 52                    | 6      | 0      | -1.933231               | 2.981335  | -1.709106 | 141 | 8   | 0 | 0.715623  | 3.117721  | 2.019888  |           |     |   |           |           |           |           |
| 53                    | 1      | 0      | -0.617023               | 1.672197  | -2.791835 | 142 | 6   | 0 | -2.941211 | 4.940968  | 2.472290  |           |     |   |           |           |           |           |
| 54                    | 6      | 0      | -4.022421               | 3.506467  | -2.812006 | 143 | 6   | 0 | 1.682375  | 3.723811  | 2.877311  |           |     |   |           |           |           |           |
| 55                    | 1      | 0      | -4.294114               | 2.662084  | -4.773981 | 144 | 6   | 0 | -2.915028 | 6.301193  | 1.826378  |           |     |   |           |           |           |           |
| 56                    | 6      | 0      | -1.054364               | 3.089033  | -0.491777 | 145 | 1   | 0 | -3.662900 | 4.303653  | 1.941837  |           |     |   |           |           |           |           |
| 57                    | 6      | 0      | -3.178639               | 3.615286  | -1.711844 | 146 | 1   | 0 | -3.259315 | 5.036246  | 3.518364  |           |     |   |           |           |           |           |
| 58                    | 1      | 0      | -4.996233               | 3.986615  | -2.797685 | 147 | 6   | 0 | 1.313019  | 5.162672  | 3.151184  |           |     |   |           |           |           |           |
| 59                    | 1      | 0      | -3.484818               | 4.188660  | -0.839262 | 148 | 1   | 0 | 2.639538  | 3.669271  | 2.353285  |           |     |   |           |           |           |           |
| 60                    | 1      | 0      | -1.054205               | 5.185400  | -0.415770 | 149 | 1   | 0 | 1.760862  | 3.164966  | 3.815887  |           |     |   |           |           |           |           |
| 61                    | 6      | 0      | -2.554031               | -0.562502 | -0.733928 | 150 | 1   | 0 | -2.117159 | 6.921164  | 2.258177  |           |     |   |           |           |           |           |
| 62                    | 6      | 0      | -1.850303               | -1.763179 | -0.717895 | 151 | 1   | 0 | -3.876046 | 6.795270  | 2.030950  |           |     |   |           |           |           |           |
| 63                    | 6      | 0      | -3.427374               | -0.256369 | -1.850167 | 152 | 8   | 0 | -2.733977 | 6.151855  | 0.435409  |           |     |   |           |           |           |           |
| 64                    | 6      | 0      | -3.159199               | -0.046123 | 0.472259  | 153 | 8   | 0 | 1.258220  | 5.841117  | 1.906970  |           |     |   |           |           |           |           |
| 65                    | 6      | 0      | -2.000375               | -2.710646 | -1.805491 | 154 | 1   | 0 | 0.338107  | 5.220921  | 3.654775  |           |     |   |           |           |           |           |
| 66                    | 6      | 0      | -1.759555               | -2.507719 | 0.511528  | 155 | 1   | 0 | 2.073664  | 5.621538  | 3.800334  |           |     |   |           |           |           |           |
| 67                    | 6      | 0      | -3.562046               | -1.154546 | -2.898501 | 156 | 6</ |   |           |           |           |           |     |   |           |           |           |           |
